# Supplementary material for: Cationic molybdenum oxo alkylidenes stabilized by N-heterocyclic carbenes: from molecular systems to efficient supported metathesis catalysts
Source: Royal Society of Chemistry journal article supplement (doi:10.1039/d2sc03321f), 2022-01-01
Supplement: d2sc03321f1.pdf [file d2sc03321f1.pdf]

# Cationic Molybdenum Oxo Alkylidenes Stabilized by *N*-Heterocyclic Carbenes: From Molecular Systems to Efficient Supported Metathesis Catalysts

Janis V. Musso,<sup>[a]‡</sup> Jordan De Jesus Silva,<sup>[b]‡</sup> Mathis J. Benedikter,<sup>[a]</sup> Jonas Groos,<sup>[a]</sup>  
Wolfgang Frey,<sup>[c]</sup> Christophe Copéret,<sup>[b]\*</sup> Michael R. Buchmeiser<sup>[a,d]\*</sup>

---

[a] M.Sc. J. V. Musso, Dr. M. J. Benedikter, M.Sc. Jonas Groos, Prof. Dr. M. R. Buchmeiser  
Institute of Polymer Chemistry, Universität Stuttgart  
Pfaffenwaldring 55, 70569 Stuttgart, Germany  
E-mail: michael.buchmeiser@ipoc.uni-stuttgart.de

[b] M.Sc. J.D.J. Silva, Prof. Dr. C. Copéret  
Department of Chemistry and Applied Biosciences, ETH Zürich,  
Vladimir-Prelog-Weg 1–5, CH-8093 Zürich, Switzerland  
E-mail: ccoperet@ethz.ch

[c] Dr. W. Frey  
Institut of Organic Chemistry, Universität Stuttgart  
Pfaffenwaldring 55, 70569 Stuttgart, Germany

[d] German Institutes of Textile and Fiber Research (DITF) Denkendorf  
Körschtalstr. 26, 73770 Denkendorf, Germany

\* Corresponding authors

‡ These authors contributed equally

## Table of Contents

|                                                                                                      |           |
|------------------------------------------------------------------------------------------------------|-----------|
| <b>1. Characterization of the Silica-Supported Complex .....</b>                                     | <b>3</b>  |
| <b>2. Experimental Procedures and Catalytic Data .....</b>                                           | <b>4</b>  |
| <b>Plots of Conversion vs Time and Selectivity vs Time for <i>Cis</i>-4-Nonene Experiments .....</b> | <b>7</b>  |
| <b>Plots of Conversion vs Time and Selectivity vs Time for 1-Nonene Experiments .....</b>            | <b>13</b> |
| <b>Recycling Tests with 1-Nonene .....</b>                                                           | <b>23</b> |
| <b>3. Solution NMR Spectra .....</b>                                                                 | <b>25</b> |
| <b>4. Single Crystal X-Ray Crystallography Data .....</b>                                            | <b>32</b> |

## 1. Characterization of the Silica-Supported Complex

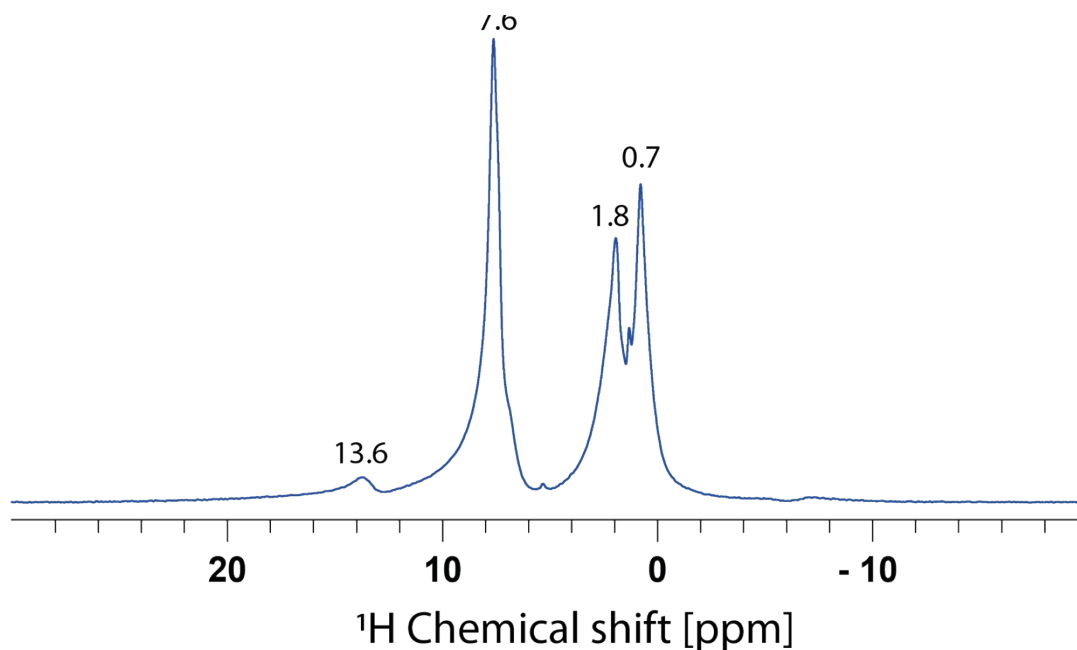

**Figure S1.** Top:  $^1\text{H}$  MAS NMR (400 MHz, spinning rate 16 kHz, recycle delay 2 s) spectrum of **Mo-6@SiO<sub>2</sub>** (\* spinning side bands); proton resonance at 13.6 ppm, *tert*-butyl proton resonances at 0.7 ppm, the methyl moieties of the mesityl groups at 1.8 ppm and the aromatic protons at 7.6 ppm, respectively.

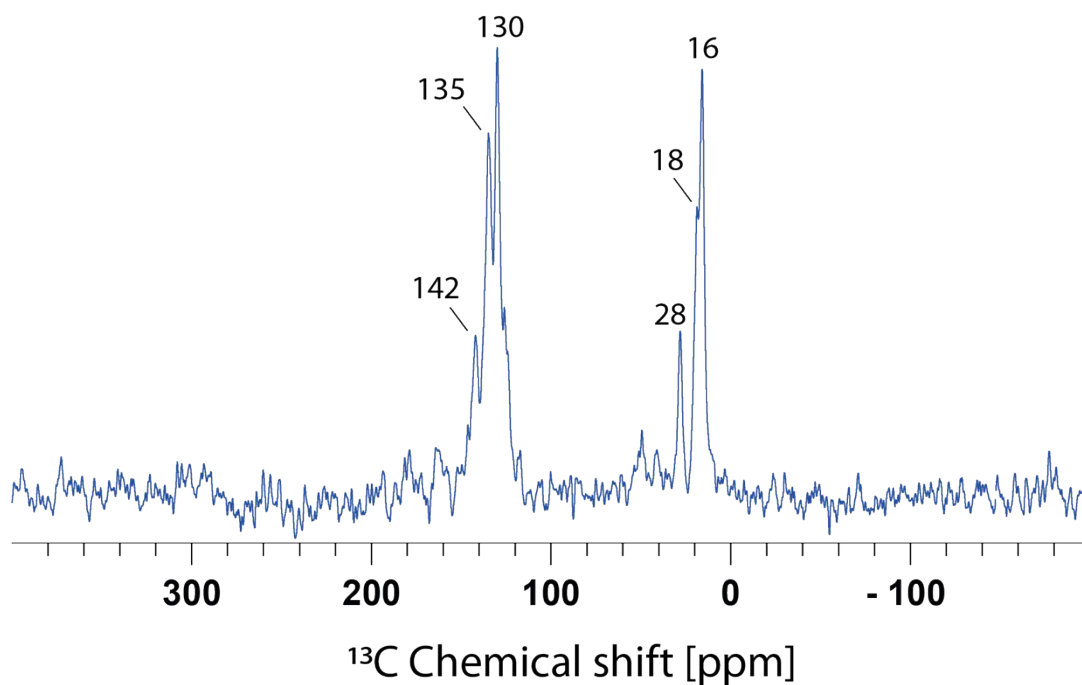

**Figure S2.**  $^{13}\text{C}$  CP MAS NMR spectrum (400 MHz, spinning rate 16 kHz, contact time 3 s) of **Mo-6@SiO<sub>2</sub>**, different methyl moieties at 16, 18 and 28 ppm, as well as the presence of

aromatics at 130, 135 and 142 ppm.

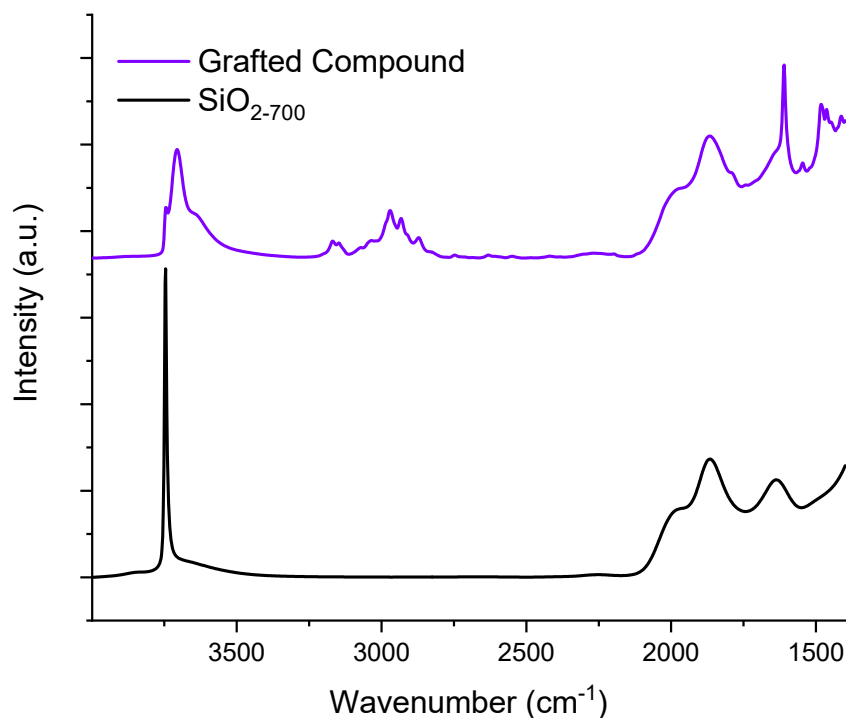

**Figure S3.** Transmission FT-IR spectra (from top) of **Mo-6@SiO<sub>2</sub>** purple, and SiO<sub>2-(700)</sub> blue.

## 2. Experimental Procedures and Catalytic Data

### Metathesis of *cis*-4-nonene:

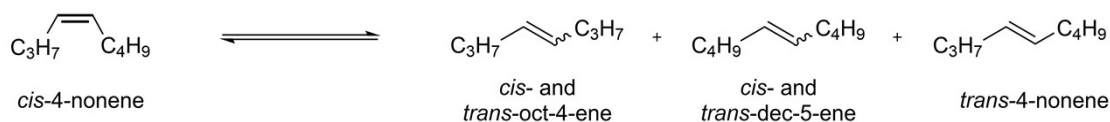

Every dispensing step for experiments with *cis*-4-nonene was performed manually inside a nitrogen-filled glovebox (<0.1 ppm H<sub>2</sub>O and O<sub>2</sub>). At t=0, a 0.95 M solution of *cis*-4-nonene in toluene or o-dichlorobenzene containing decaline as internal standard (0.1 M) was added to the catalyst placed inside a 10 mL screw cap vial containing a magnetic stirrer, and the reaction was stirred at 620 rpm. The reaction mixtures were agitated for 1 hour and 10 μL aliquots were taken after ca. 3, 5, 10, 30 and 60 min after the addition of *cis*-4-nonene. The aliquots were dispensed into GC vials containing 500 μL of a solution of 4-heptanone in toluene (ca 5.6·10<sup>-4</sup> M) for quenching. The resulting solution was analyzed by GC/FID (Agilent Technologies 7890 A) equipped with an HP-5 (Agilent Technologies) column. Quantification gave conversions and (*E*)/(*Z*) selectivities for oct-4-ene and dec-5-ene. Equilibrium conversion was reached at ca. 50%.

**Metathesis of 1-nonene:**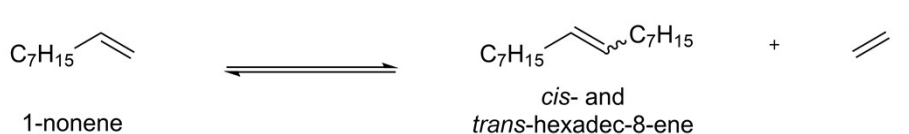

Every agitation and dispensing step for experiments with 1-nonene were performed by the liquid handling robot (Zinsser Analytics) operated inside a nitrogen-filled glovebox (<0.1 ppm H<sub>2</sub>O and O<sub>2</sub>). At t=0, a 0.95 M solution of 1-nonene in toluene or *o*-dichlorobenzene containing decaline as internal standard (0.1 M) was added to the catalyst introduced in a 10 mL vial and the reaction mixture was agitated at 300 rpm. Catalytic tests were conducted open to the glovebox atmosphere. The reaction mixtures were agitated for 8 hours and 30 μL aliquots were taken after ca. 3, 10, 30, 60, 120, 240 and 480 min after the addition of 1-nonene. The aliquots were dispensed into GC vials containing 500 μL of a solution of 4-heptanone in toluene (ca 5.6 · 10<sup>-4</sup> M) for quenching. The resulting solution was analyzed by GC/FID (Agilent Technologies 7890 A) equipped with an HP-5 (Agilent Technologies) column. Quantification gave conversions and (*E*)/(*Z*) selectivities for hexadec-8-ene. Maximum conversion is reached at ca. 100% in our conditions.

$$X(\text{substrate}) = \frac{n(\text{substrate})_{\text{initial}} - n(\text{substrate})}{n(\text{substrate})_{\text{initial}}} \times 100\% \quad (1)$$

$$\text{TOF}_{3\text{min}} = \frac{X(\text{substrate}) \text{ at } 3\text{min}}{100 \times 3 \text{ min}} \times \frac{n(\text{substrate})}{n(\text{catalyst})}, \text{ in } [\text{min}^{-1}] \quad (2)$$

$$S_{\text{C}_{16}}(E/Z) = \frac{n(\text{C}_{16}E) / n(\text{C}_{16})}{(n(\text{C}_{16}) - n(\text{C}_{16}E)) / n(\text{C}_{16})} \quad (3)$$

**Table S1.** Homometathesis of *cis*-4-nonene (toluene, 30 °C).

| <i>Catalyst</i> <sup>a</sup>               | <i>mol%</i> | <i>TOF</i> <sub>3min</sub> <sup>[a]</sup> | <i>Time to equilibrium conversion</i> <sup>[b][c]</sup> |
|--------------------------------------------|-------------|-------------------------------------------|---------------------------------------------------------|
| <b>Mo-6</b> <sup>[d]</sup>                 | 0.1         | – (<1%)                                   | 5% after 24 h                                           |
| <b>Mo-6@SiO<sub>2</sub></b> <sup>[d]</sup> | 0.1         | 18 (6%)                                   | 50% after 16 h                                          |
| <b>Mo-6@SiO<sub>2</sub></b>                | 0.1         | 26 (8%)                                   | 50% after 4 h                                           |

<sup>[a]</sup> TOF at 3 min, given in min<sup>-1</sup> with the corresponding conversions given in brackets. <sup>[b]</sup> In cases where full

conversion was not reached, the maximum conversion measured after a given time is provided. <sup>[c]</sup> Equilibrium conversion is 50%. <sup>[d]</sup> Experiment performed in *o*-dichlorobenzene.

**Table S2.** Homometathesis of 1-nonene (toluene, 30 °C).

| <i>Catalyst</i> <sup>a</sup>               | <i>mol%</i> | <i>TOF</i> <sub>3min</sub> <sup>[a]</sup> | <i>Time to maximum conversion</i><br><sup>[b][c]</sup> |
|--------------------------------------------|-------------|-------------------------------------------|--------------------------------------------------------|
| <b>Mo-6</b> <sup>[d]</sup>                 | 0.1         | 47 (14%)                                  | 86% after 8 h                                          |
| <b>Mo-6@SiO<sub>2</sub></b> <sup>[e]</sup> | 0.1         | 124 (37%)                                 | 98% after 4 h                                          |
| <b>Mo-6@SiO<sub>2</sub></b>                | 0.1         | 118 (36%)                                 | 98% after 4 h                                          |
| <b>Mo-6@SiO<sub>2</sub></b>                | 0.02        | 254 (15%)                                 | 97% after 8 h                                          |
| <b>Mo-6@SiO<sub>2</sub></b>                | 0.005       | 225 (7%)                                  | 94% after 8 h                                          |

<sup>[a]</sup> TOF at 3 min, given in min<sup>-1</sup> with the corresponding conversions given in brackets. <sup>[b]</sup> In cases where conversion was not reached, the maximum conversion measured after a given time is provided. <sup>[c]</sup> Maximum conversion is 100%. <sup>[d]</sup> Experiment performed in *o*-dichlorobenzene.

## Plots of Conversion vs Time and Selectivity vs Time for *Cis*-4-Nonene Experiments

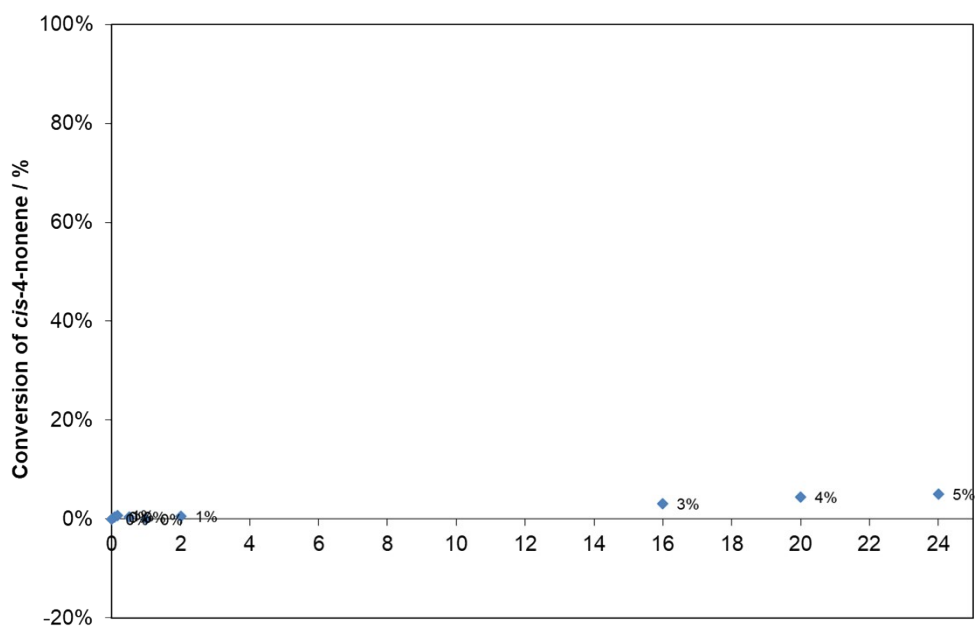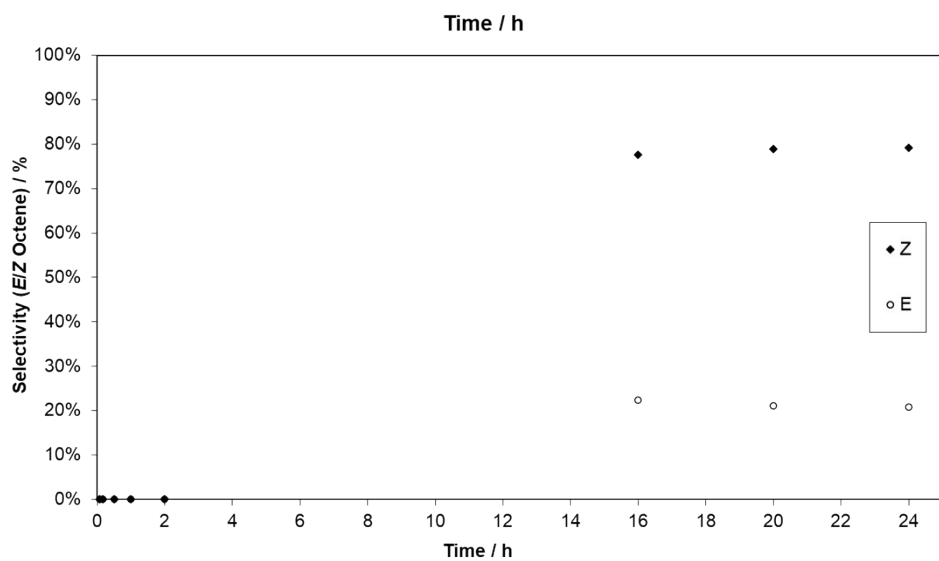

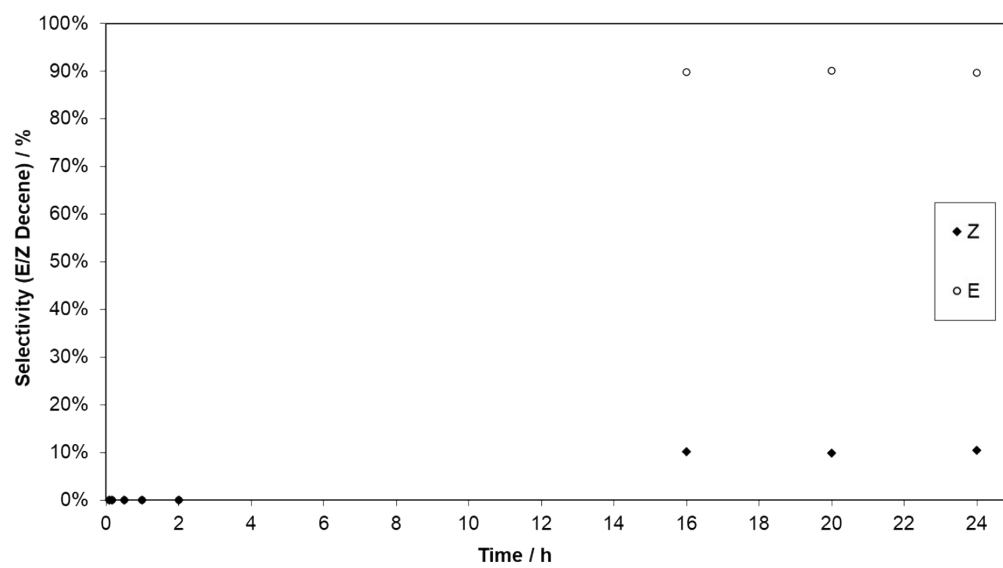

**Figure S4.** Conversion vs time and selectivity vs time plots for **Mo-6** (0.1 mol%) in *o*-dichlorobenzene.



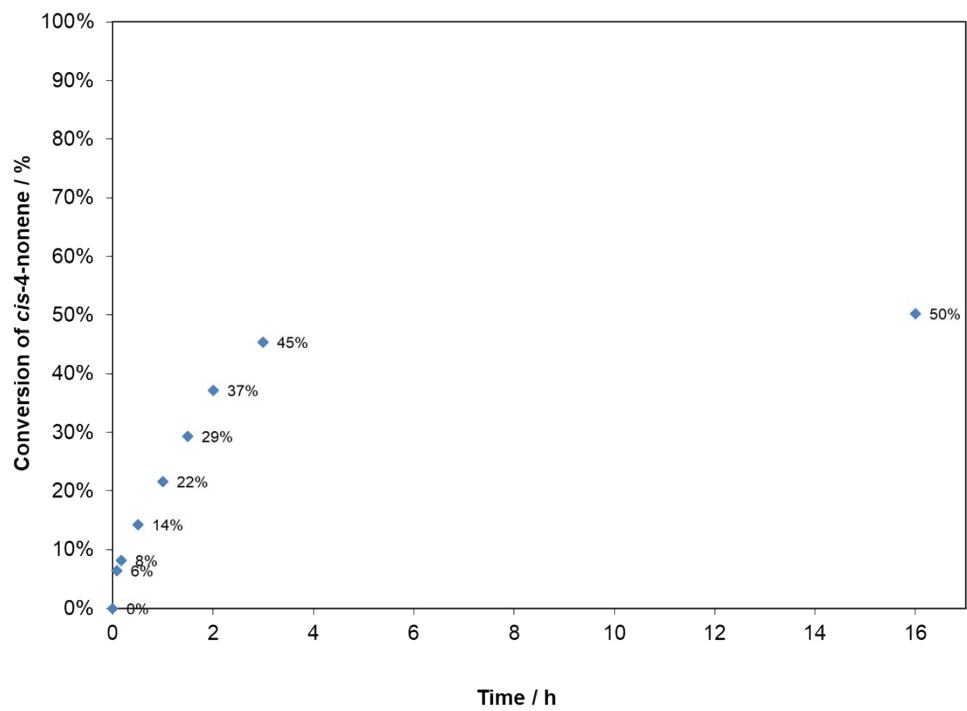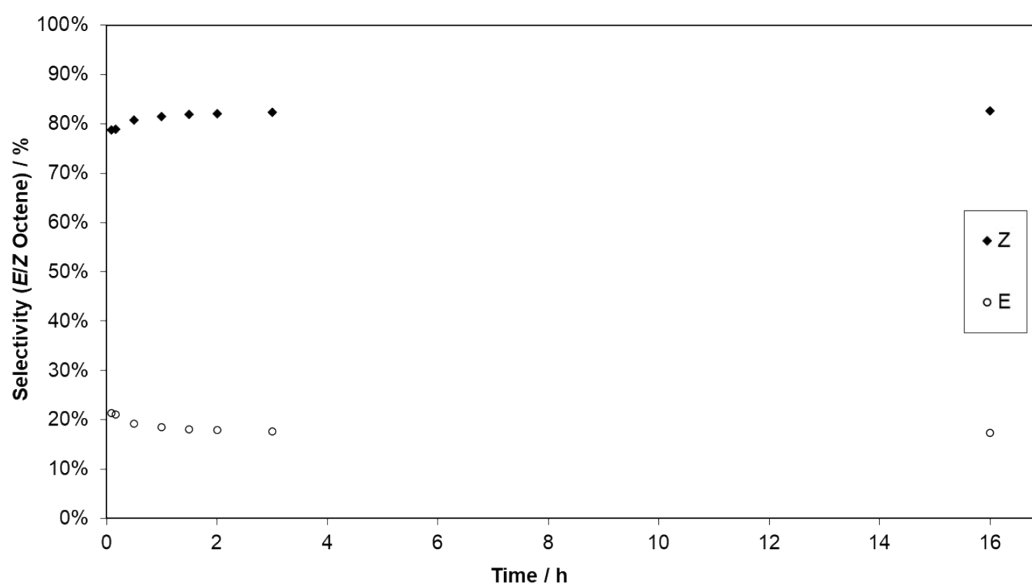

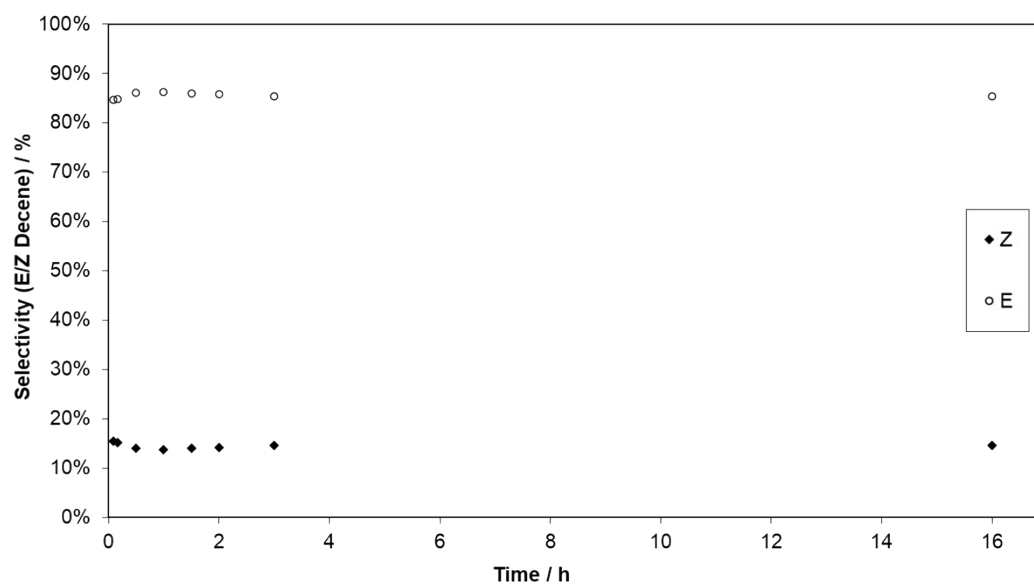

**Figure S5.** Conversion vs time and selectivity vs time plots for **Mo-6@SiO<sub>2</sub>** (0.1 mol%) in *o*-dichlorobenzene.

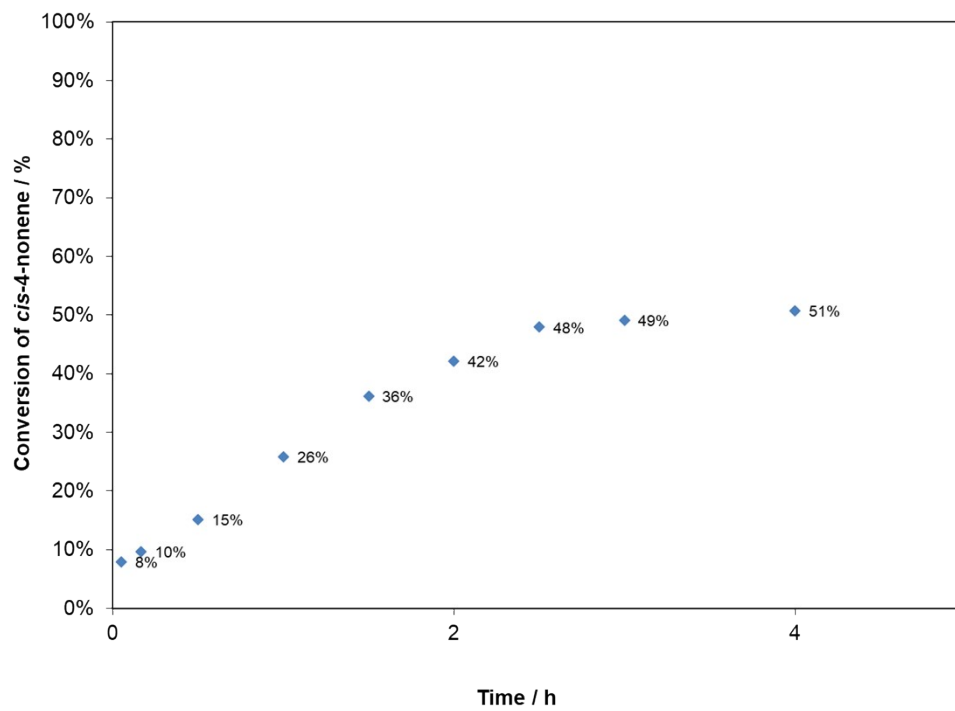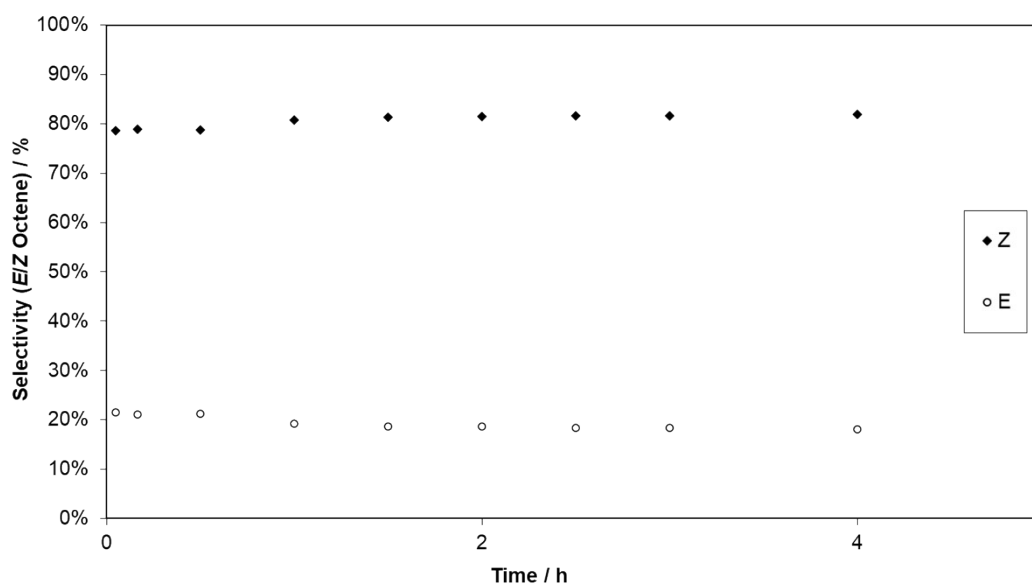

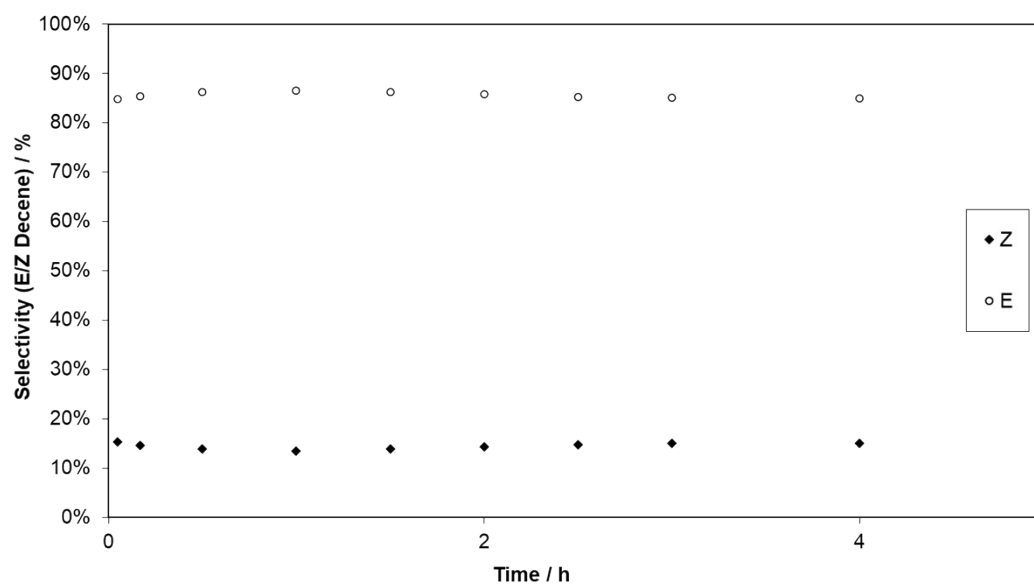

**Figure S6.** Conversion vs time and selectivity vs time plots for **Mo-6@SiO<sub>2</sub>** (0.1 mol%) in toluene.

## Plots of Conversion vs Time and Selectivity vs Time for 1-Nonene Experiments

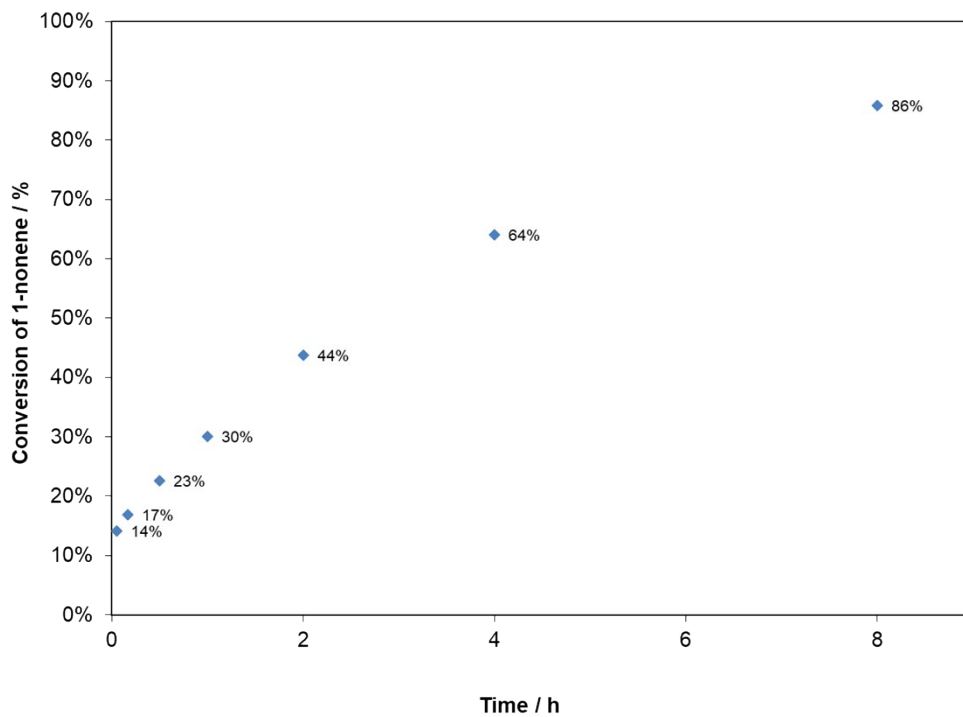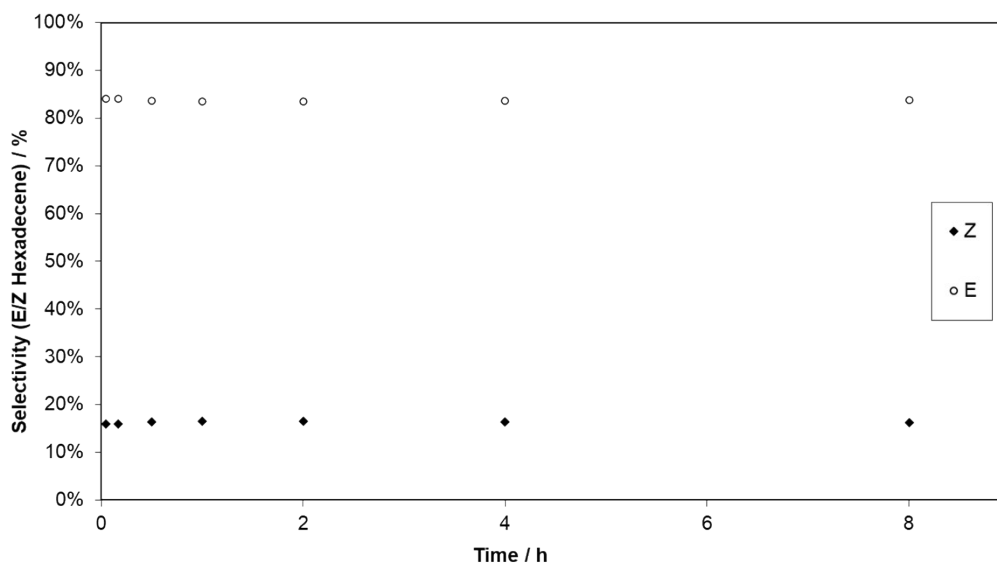

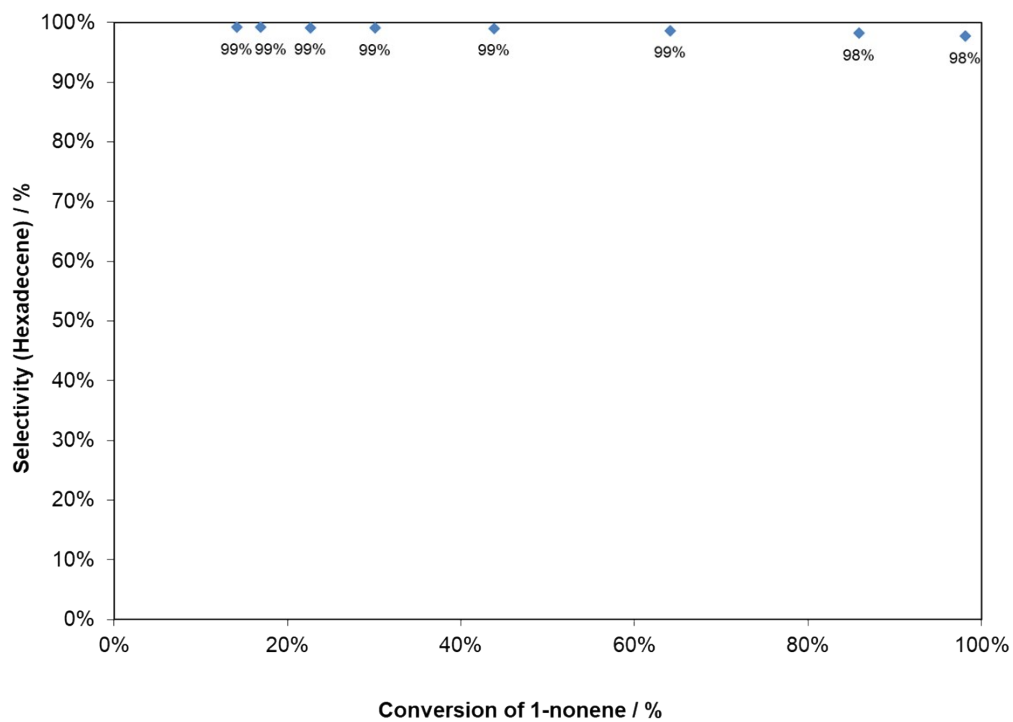

**Figure S7.** Conversion vs time, selectivity vs time and conversion vs selectivity plots for **Mo-6** (0.1 mol%) in *o*-dichlorobenzene.

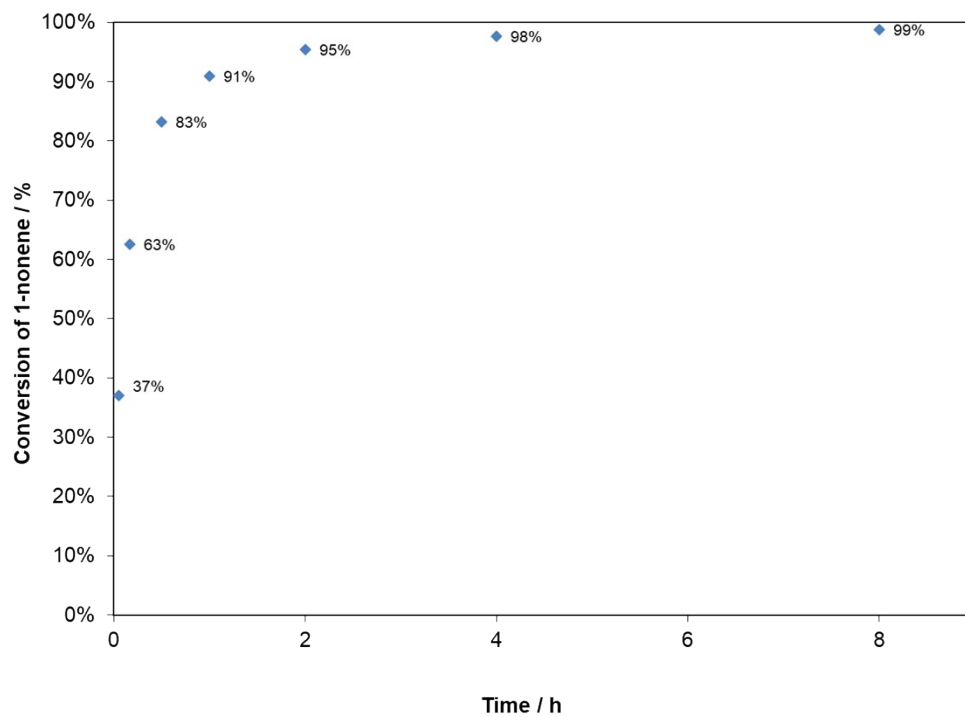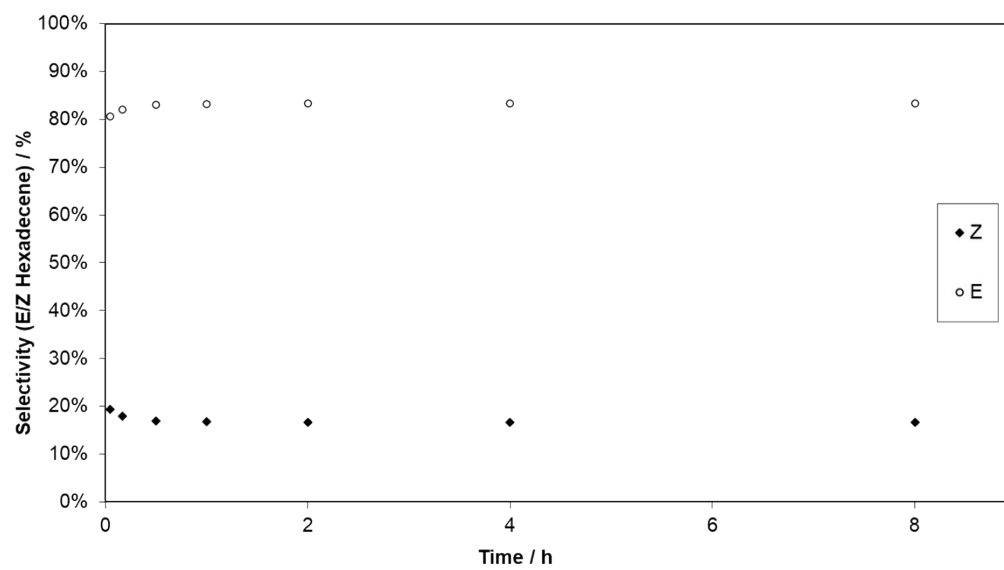

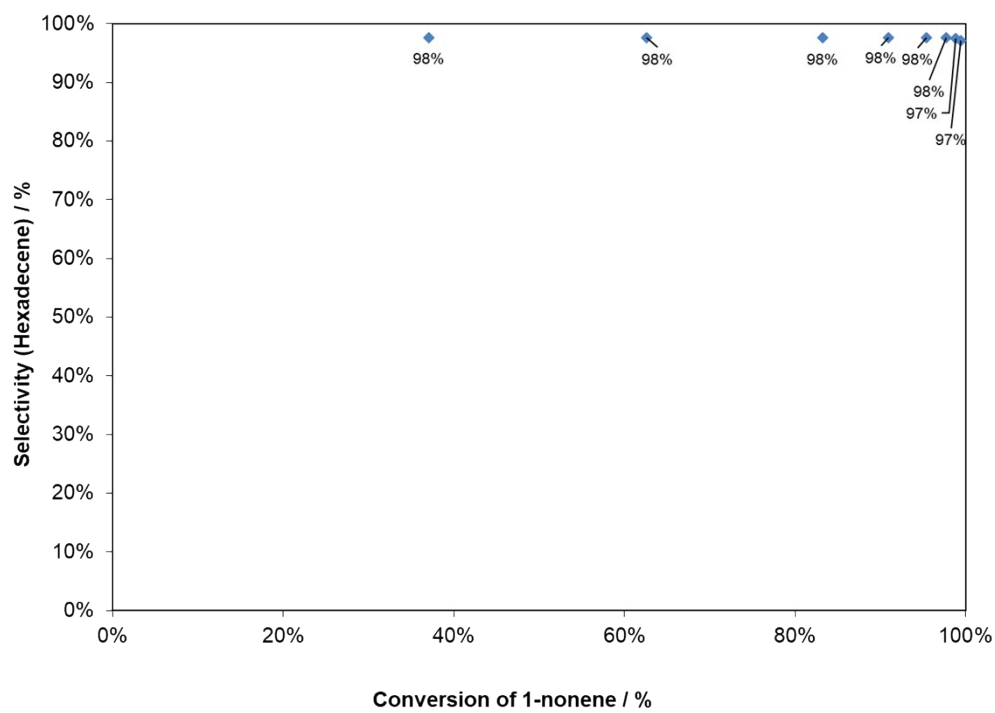

**Figure S8.** Conversion vs time, selectivity vs time and conversion vs selectivity plots for **Mo-6@SiO<sub>2</sub>** (0.1 mol%) in *o*-dichlorobenzene.



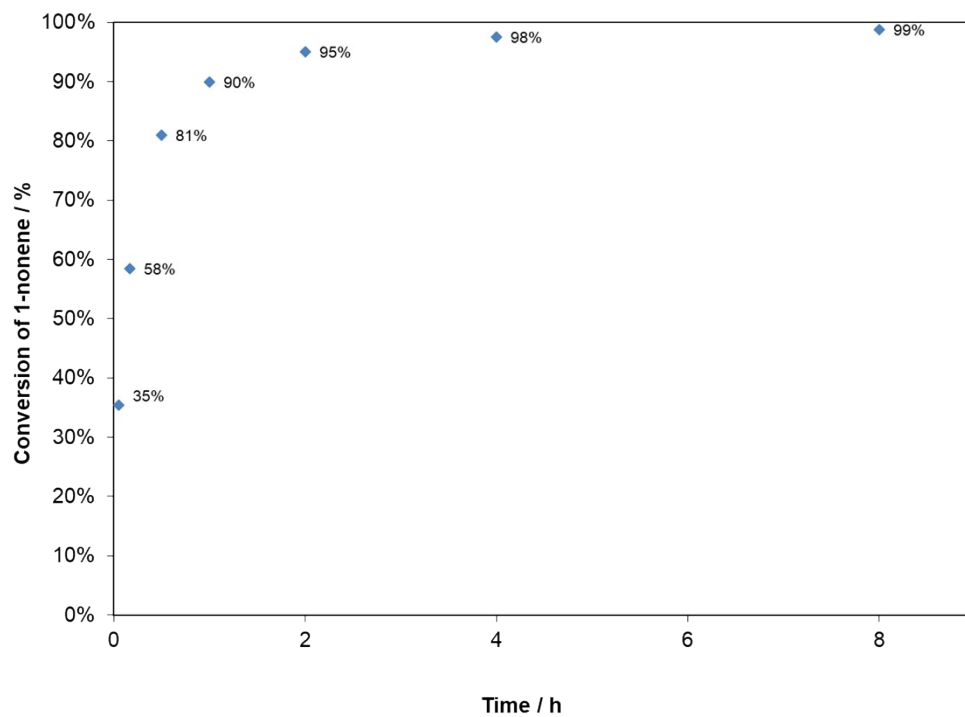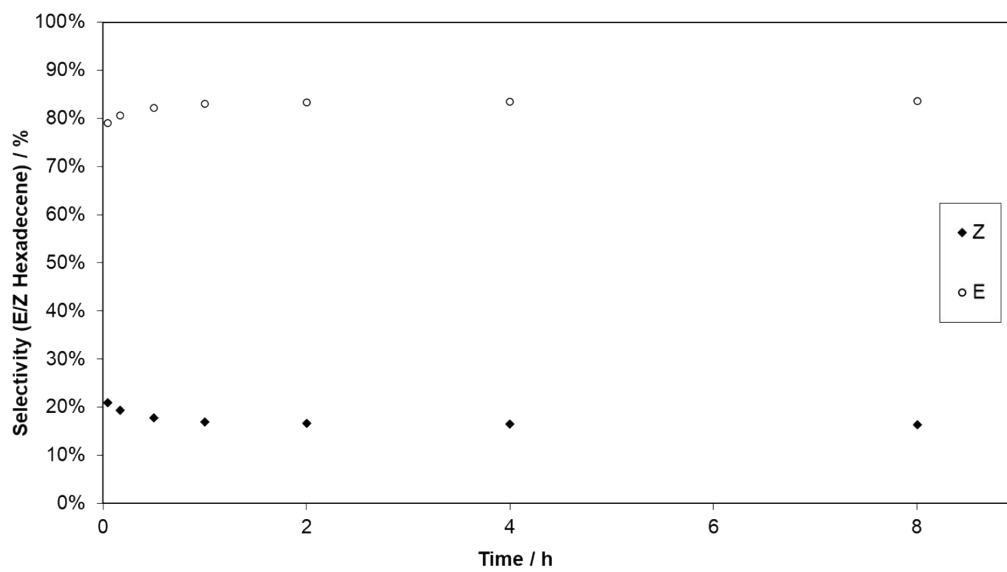

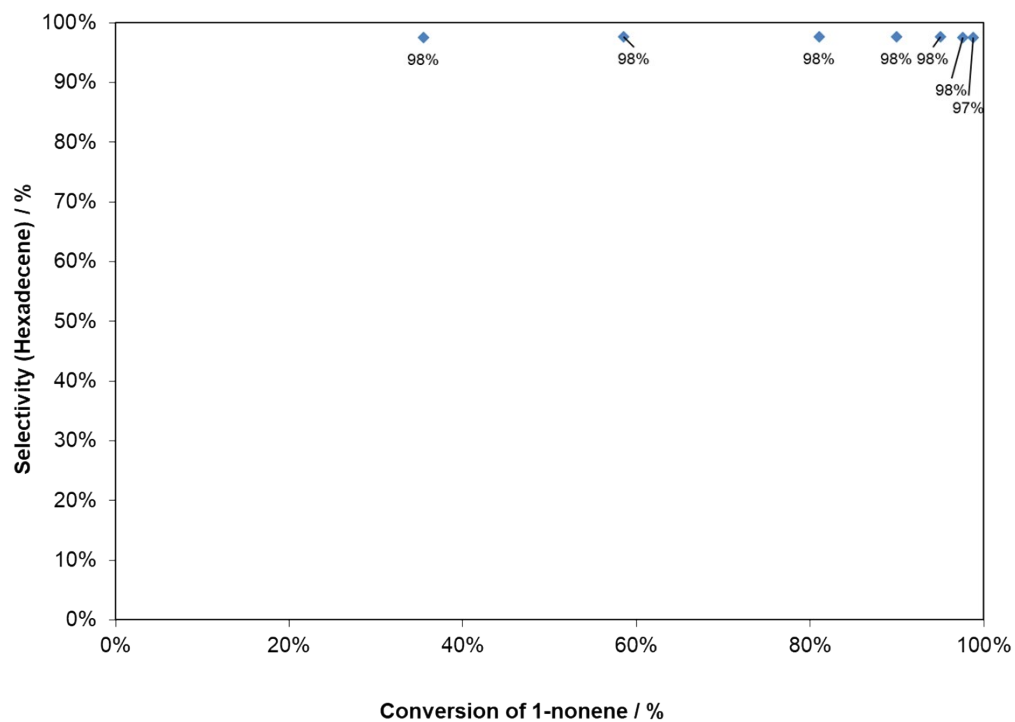

**Figure S9.** Conversion vs time, selectivity vs time and conversion vs selectivity plots for **Mo-6@SiO<sub>2</sub>** (0.1 mol%) in toluene.

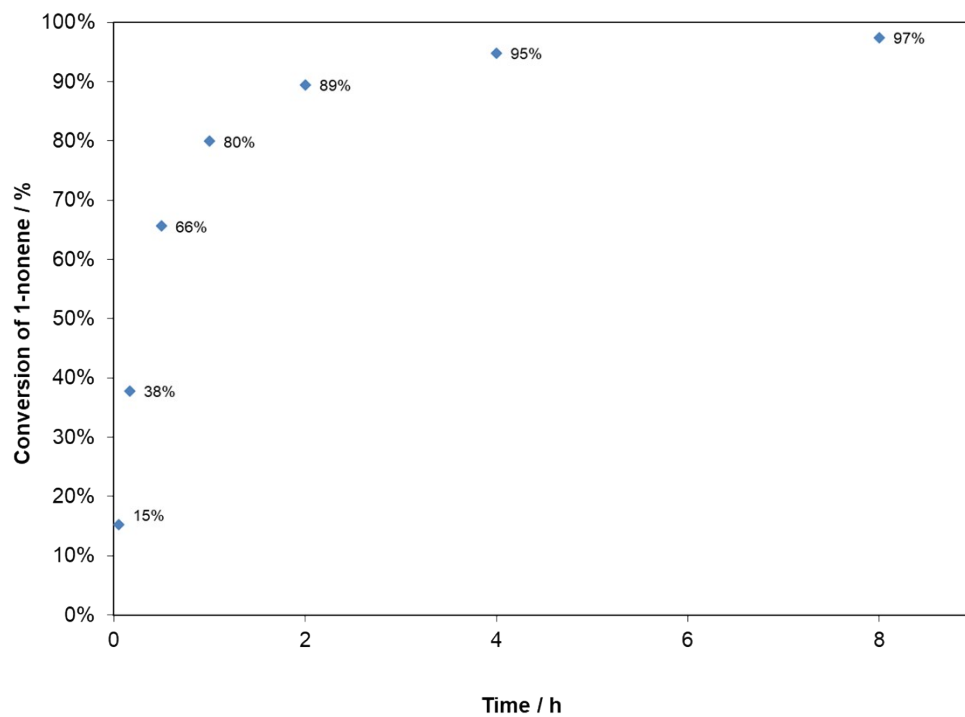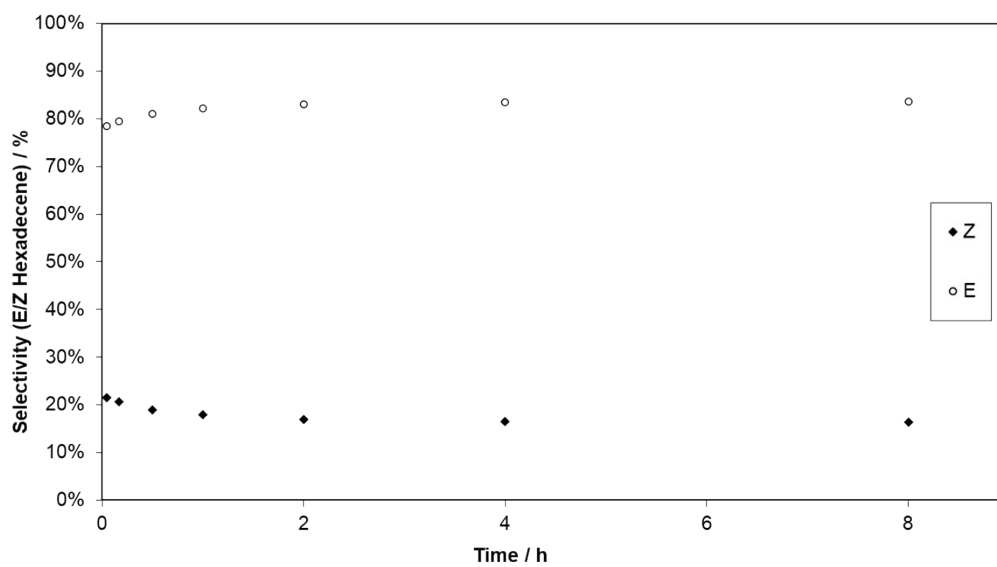

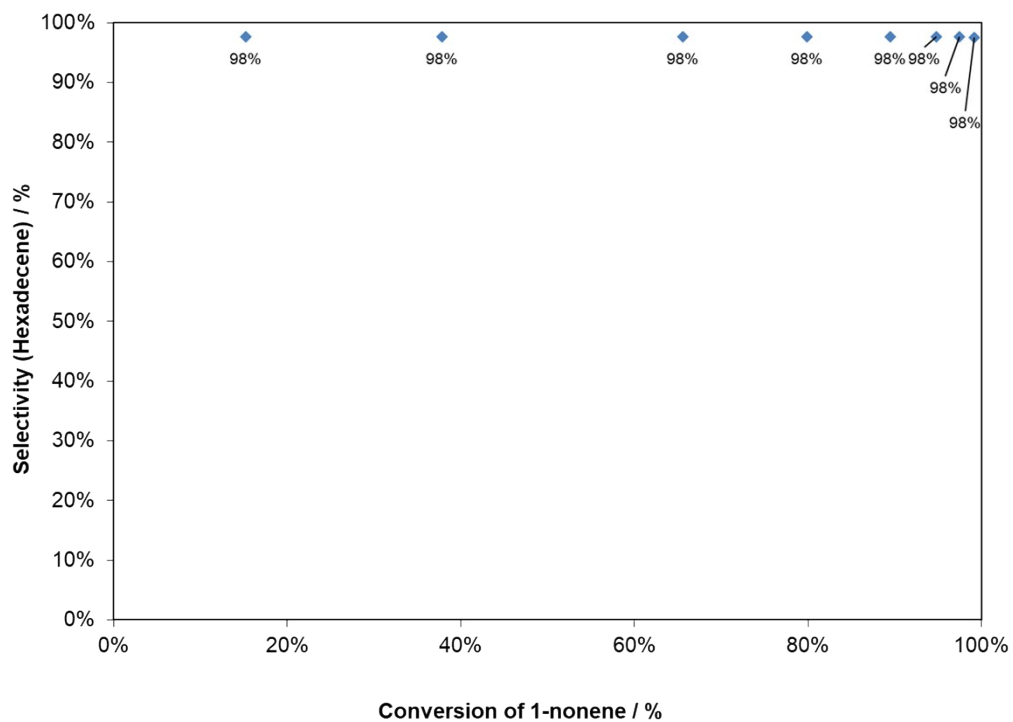

**Figure S10.** Conversion vs time, selectivity vs time and conversion vs selectivity plots for **Mo-6@SiO<sub>2</sub>** (0.02 mol%) in toluene.

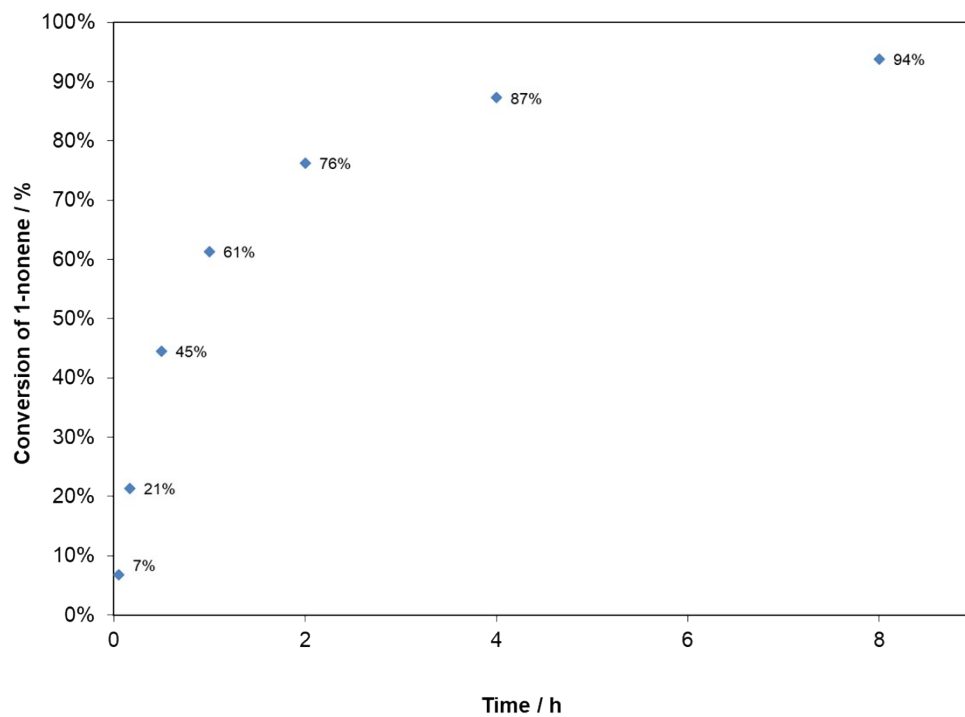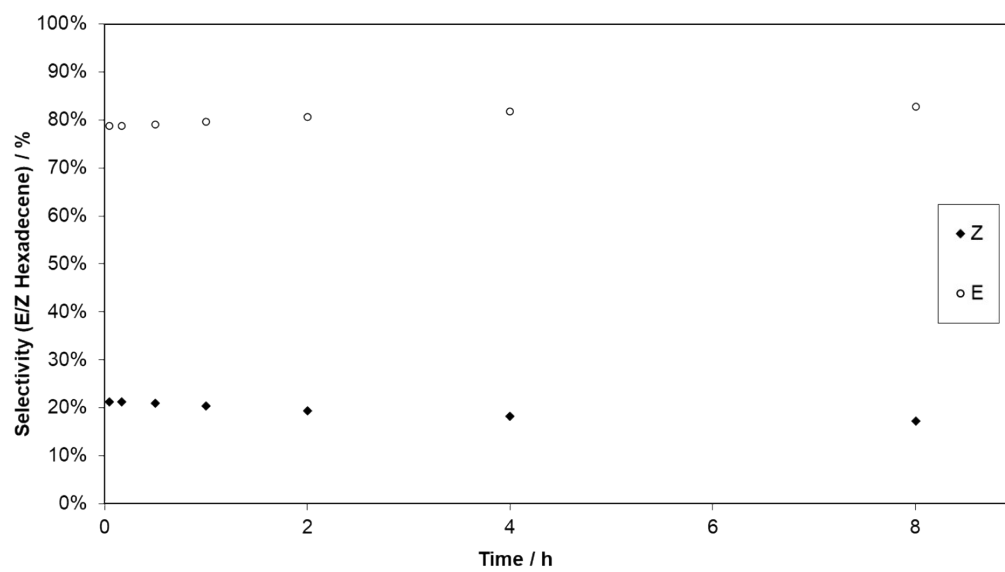

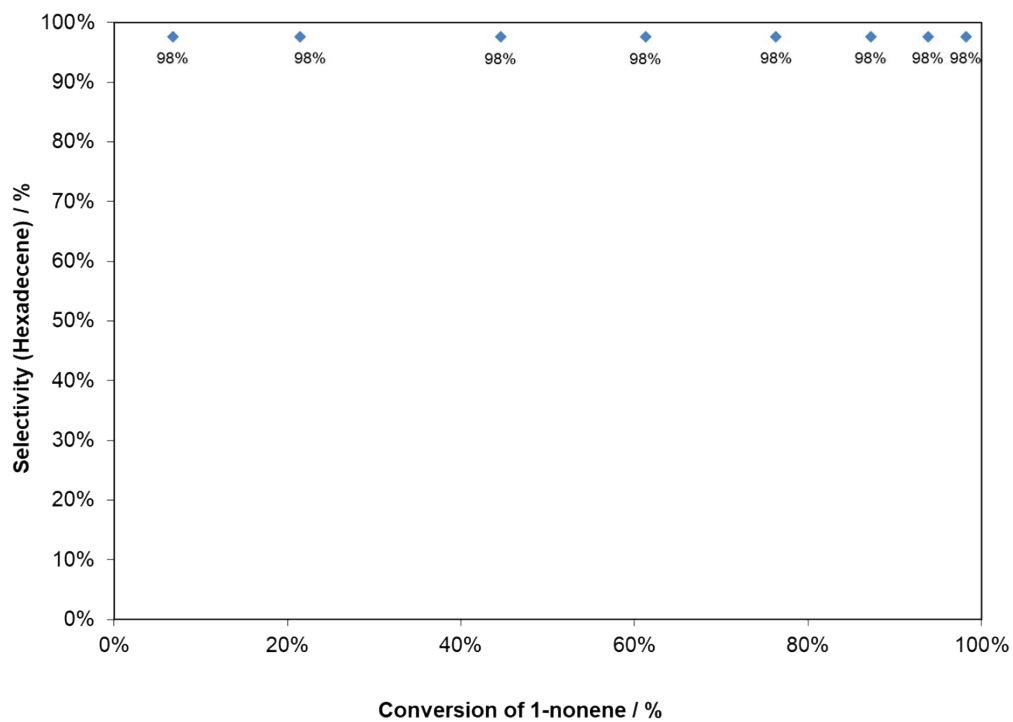

**Figure S11.** Conversion vs time, selectivity vs time and conversion vs selectivity plots for **Mo-6@SiO<sub>2</sub>** (0.01 mol%) in toluene.

## Recycling Tests with 1-Nonene

Every agitation and dispensing step for experiments with 1-nonene was performed by a liquid handling robot (Zinsser Analytics) operated inside a nitrogen-filled glovebox ( $<0.1$  ppm  $\text{H}_2\text{O}$  and  $\text{O}_2$ ). The procedure for 1-nonene experiments (described in Experimental Procedures and Catalytic Data) was repeated three times sequentially with **Mo-6@SiO<sub>2</sub>** (0.1 mol%). Washing steps consisting of aspiration of the reaction solution, addition of 2 mL of toluene, 3 minutes of agitation, waiting 1 minute for the solids to settle and withdrawing 2 mL of washings, were included. This washing procedure was repeated 3 times, before continuing with the next experiment.

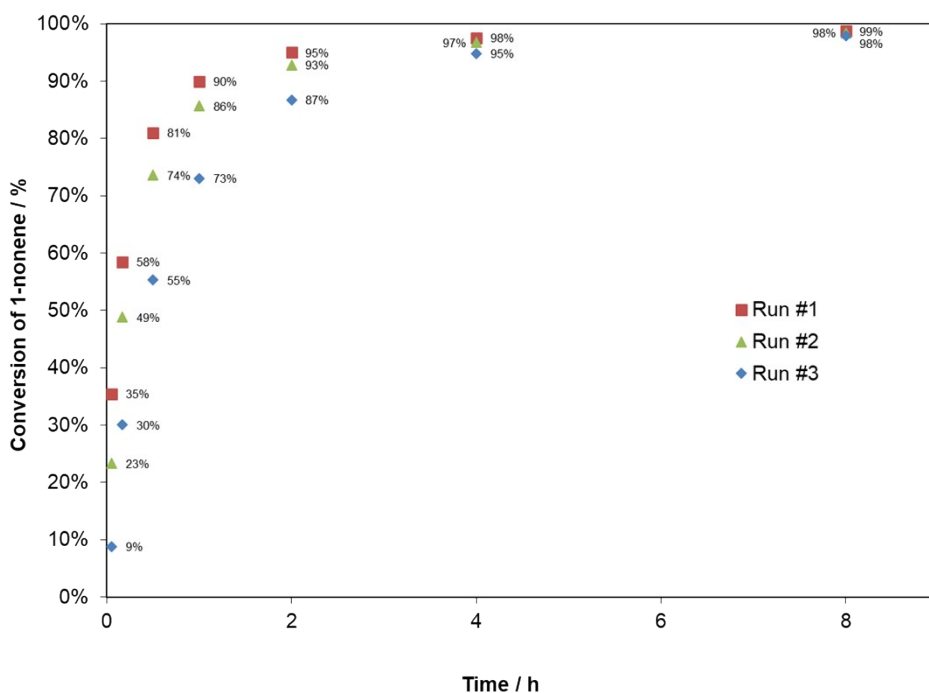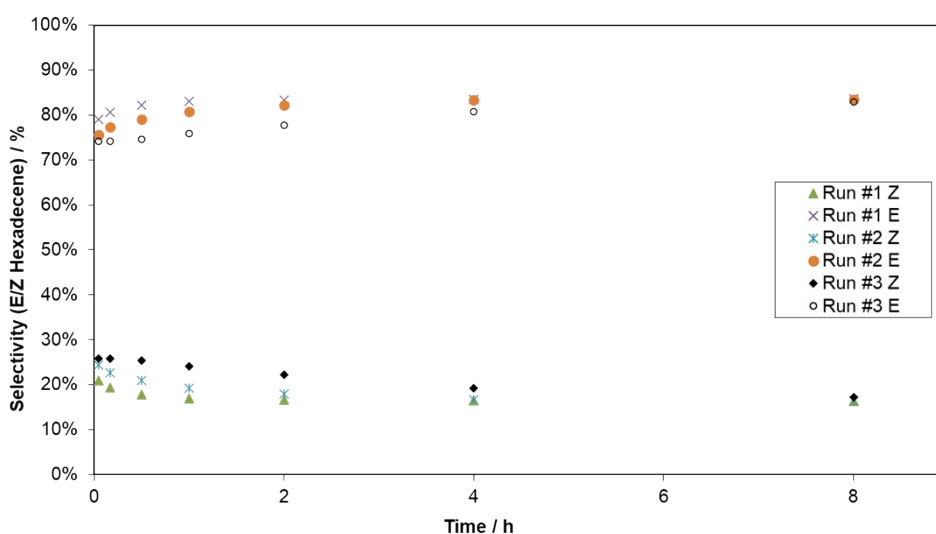

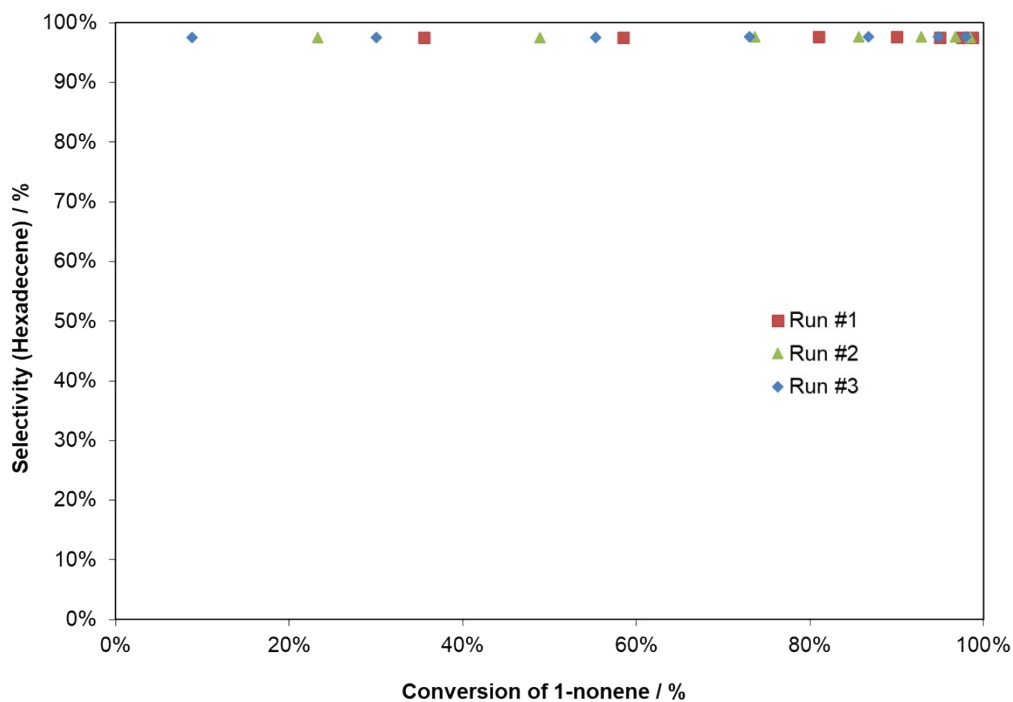

**Figure S12.** Conversion vs time, selectivity vs time and conversion vs selectivity plots for recycling tests performed three times with **Mo-6@SiO<sub>2</sub>** (0.1 mol%) in toluene.

**Table S3.** Homometathesis of 1-nonene with **Mo-6@SiO<sub>2</sub>** (0.1 mol%, toluene, 30 °C).

| <i>Run<sup>a</sup></i> | <i>TOF<sub>3min</sub><sup>[a]</sup></i> | <i>Time to maximum conversion<sup>[b][c]</sup></i> |
|------------------------|-----------------------------------------|----------------------------------------------------|
| #1                     | 118 (35%)                               | 98% after 4 h                                      |
| #2                     | 78 (23%)                                | 97% after 4 h                                      |
| #3                     | 29 (9%)                                 | 98% after 8 h                                      |

<sup>[a]</sup> TOF at 3 min, given in min<sup>-1</sup> with the corresponding conversions given in brackets. <sup>[b]</sup> In cases where full conversion was not reached, the maximum conversion measured after a given time is provided. <sup>[c]</sup> Maximum conversion is 100%.



### 3. Solution NMR Spectra

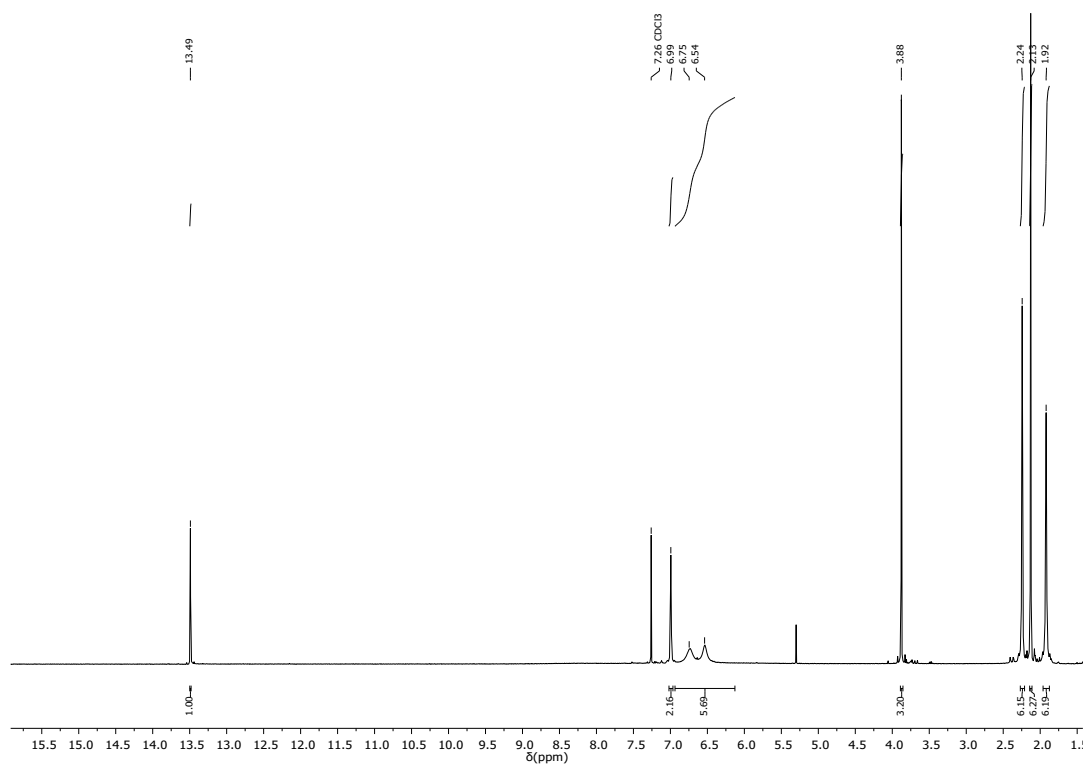

**Figure S13.**  $^1\text{H-NMR}$  spectrum (400 MHz,  $\text{CDCl}_3$ , 25 °C) of  $[\text{MoO}(\text{CH-4-OMeC}_6\text{H}_4)(\text{OC}(\text{CF}_3)_2)_2(\text{IMesCl}_2)]$  (**Mo-2**).

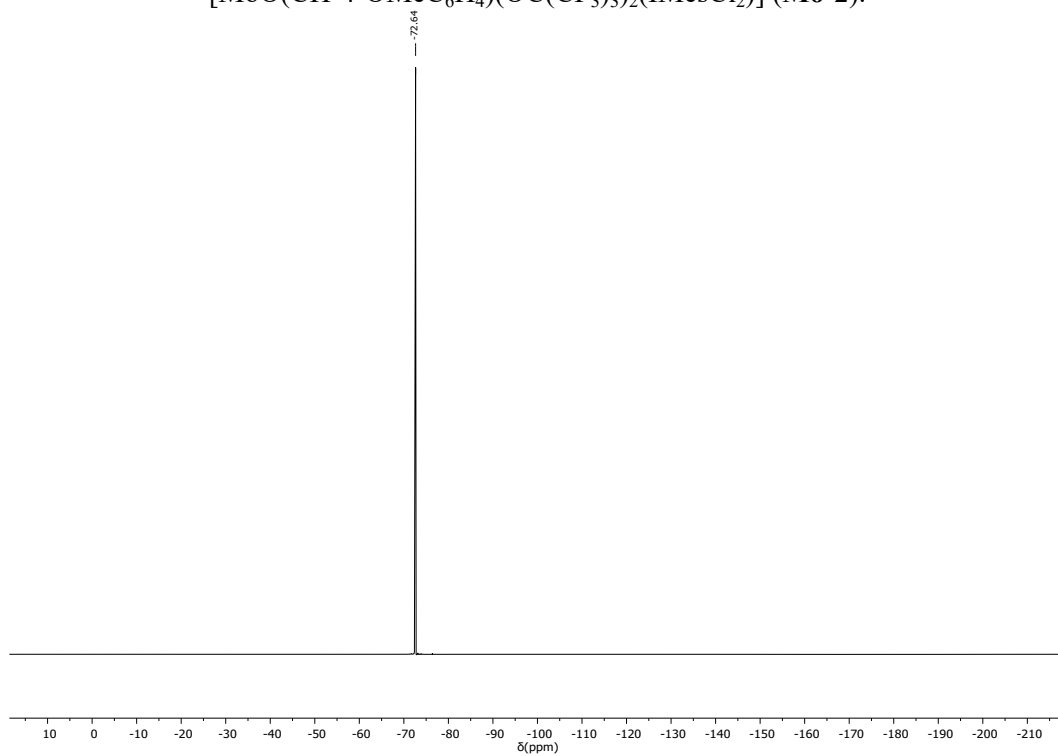

**Figure S14.**  $^{19}\text{F-NMR}$  spectrum (375 MHz,  $\text{CDCl}_3$ , 25 °C) of  $[\text{MoO}(\text{CH-4-OMeC}_6\text{H}_4)(\text{OC}(\text{CF}_3)_2)_2(\text{IMesCl}_2)]$  (**Mo-2**).

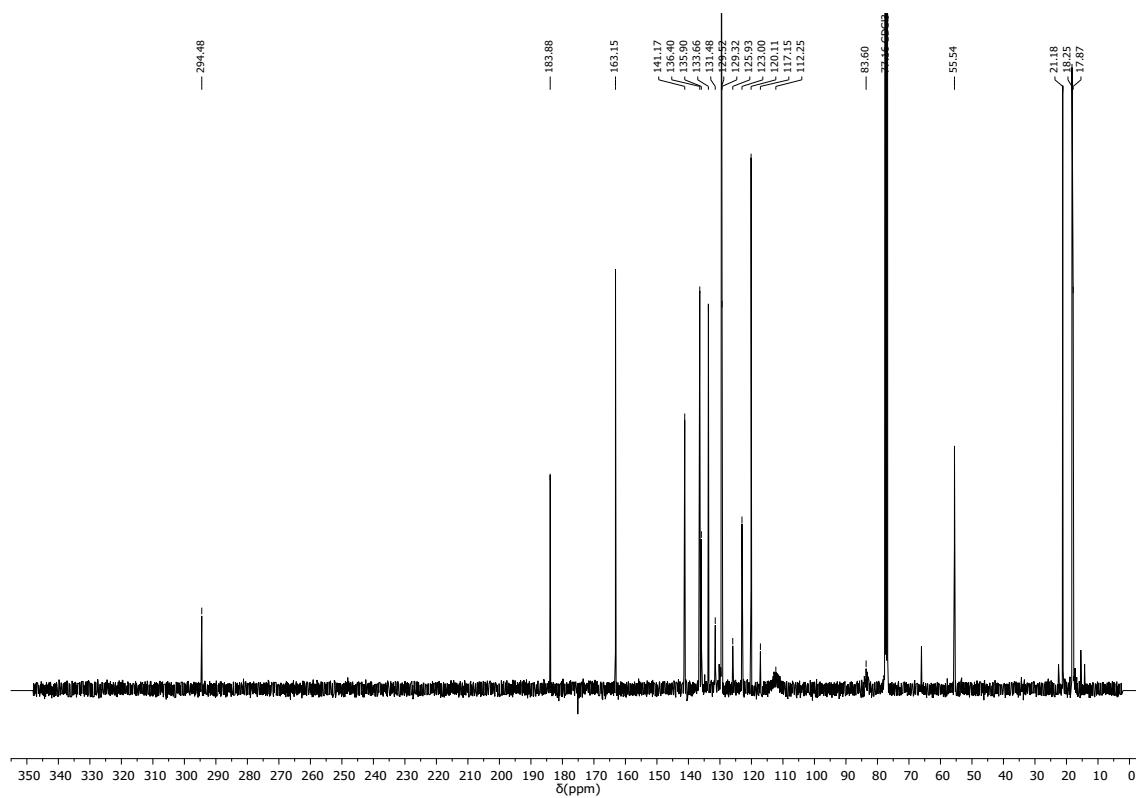

**Figure S15.**  $^{13}\text{C}$ -NMR spectrum (100 MHz,  $\text{CDCl}_3$ , 25 °C) of  $[\text{MoO}(\text{CH-4-OMeC}_6\text{H}_4)(\text{OC}(\text{CF}_3)_2)_2(\text{IMesCl}_2)]$  (**Mo-2**).

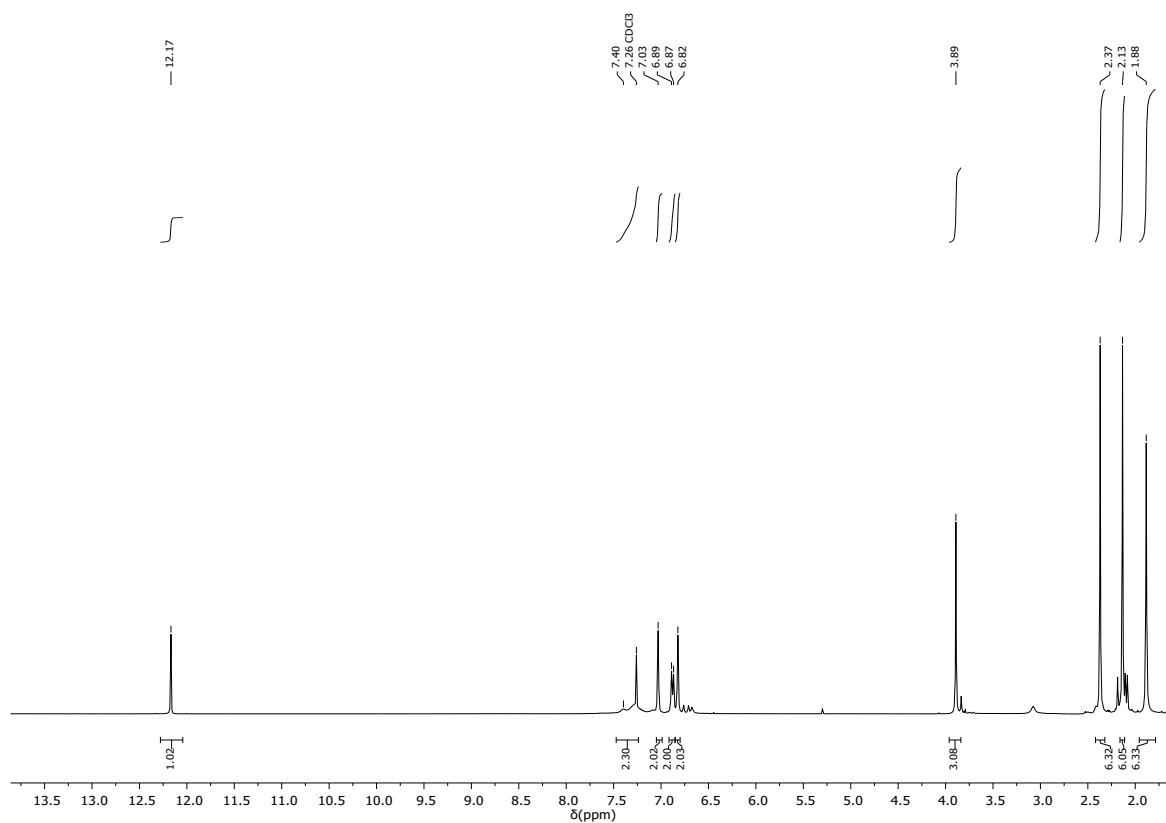

**Figure S16.**  $^1\text{H}$ -NMR spectrum (400 MHz,  $\text{CDCl}_3$ , 25 °C) of  $[\text{MoO}(\text{CH-4-OMeC}_6\text{H}_4)(\text{OC}(\text{CF}_3)_2)_2(\text{IMesCl}_2)]$  (**Mo-2**).

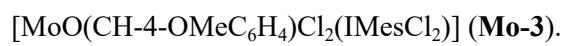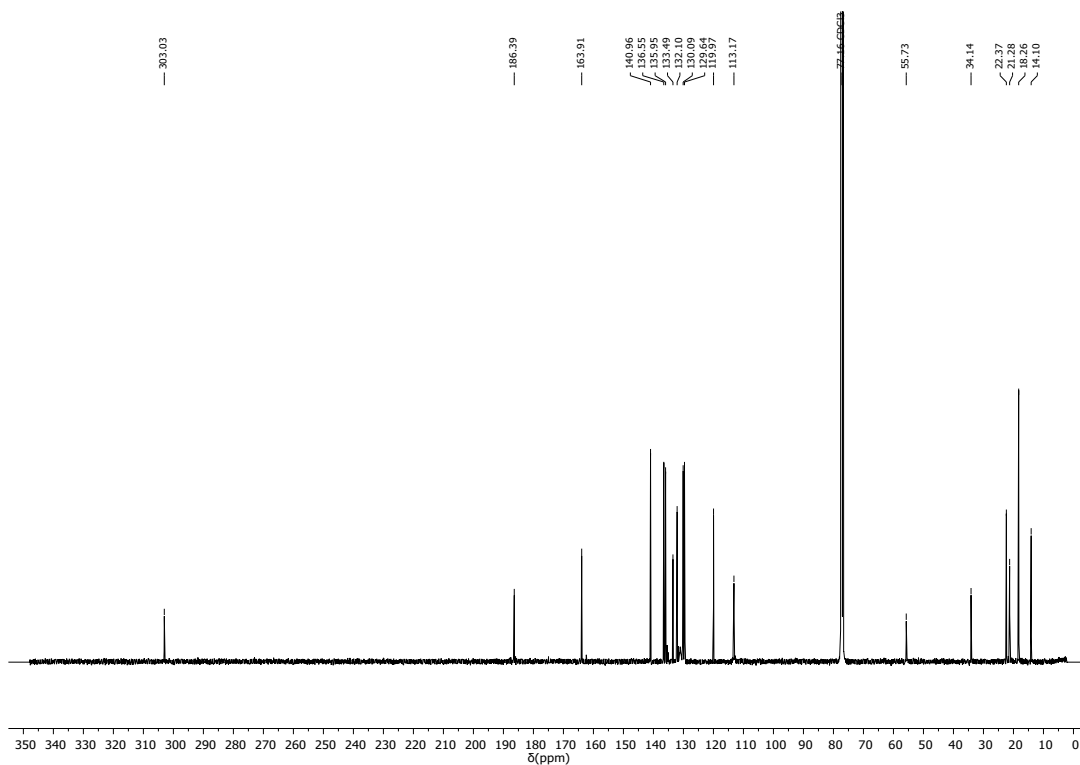

**Figure S17.** <sup>13</sup>C-NMR spectrum (100 MHz, CDCl<sub>3</sub>, 25 °C) of [MoO(CH-4-OMeC<sub>6</sub>H<sub>4</sub>)Cl<sub>2</sub>(IMesCl<sub>2</sub>)] (**Mo-3**).

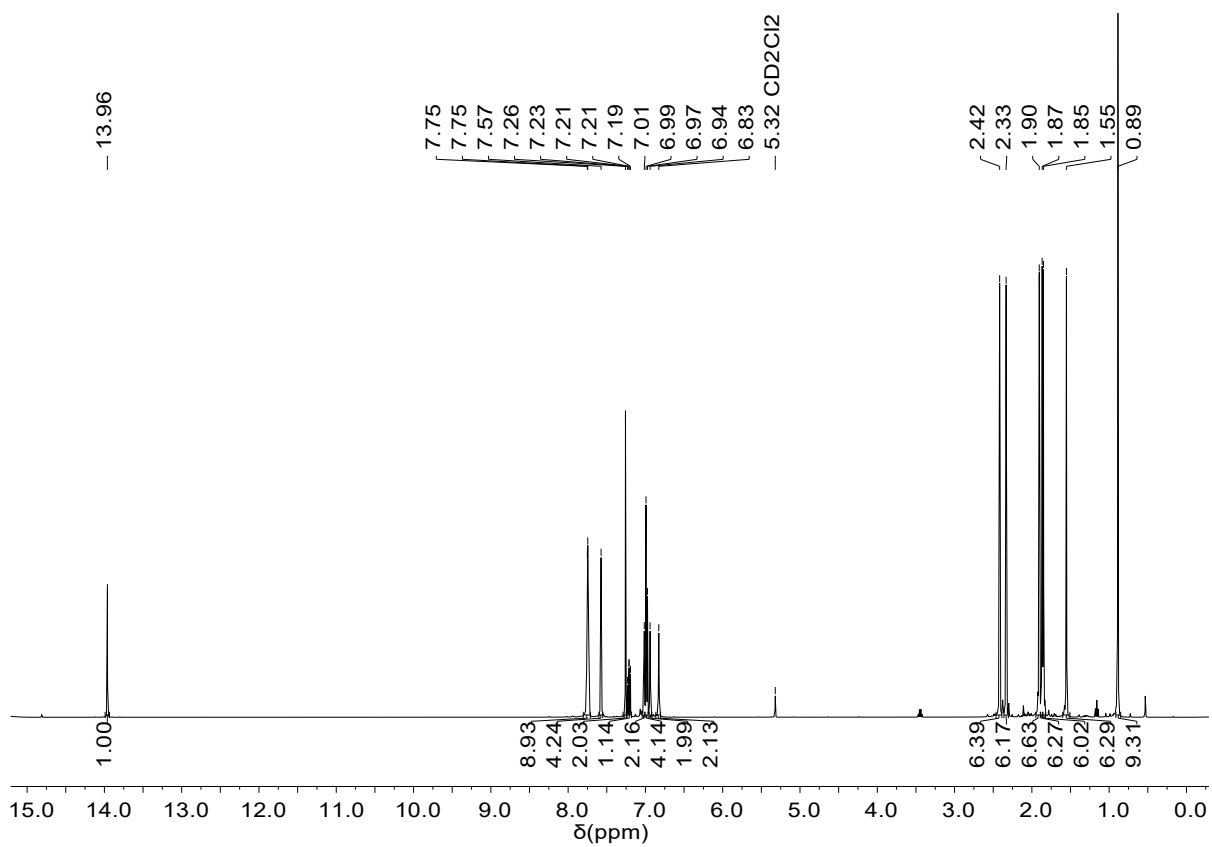

**Figure S18.** <sup>1</sup>H-NMR spectrum (400 MHz, CD<sub>2</sub>Cl<sub>2</sub>, 25 °C) of [MoO(CHCMe<sub>3</sub>)(OHMT)(IMes)][B(Ar<sup>F</sup>)<sub>4</sub>] (**Mo-6**).

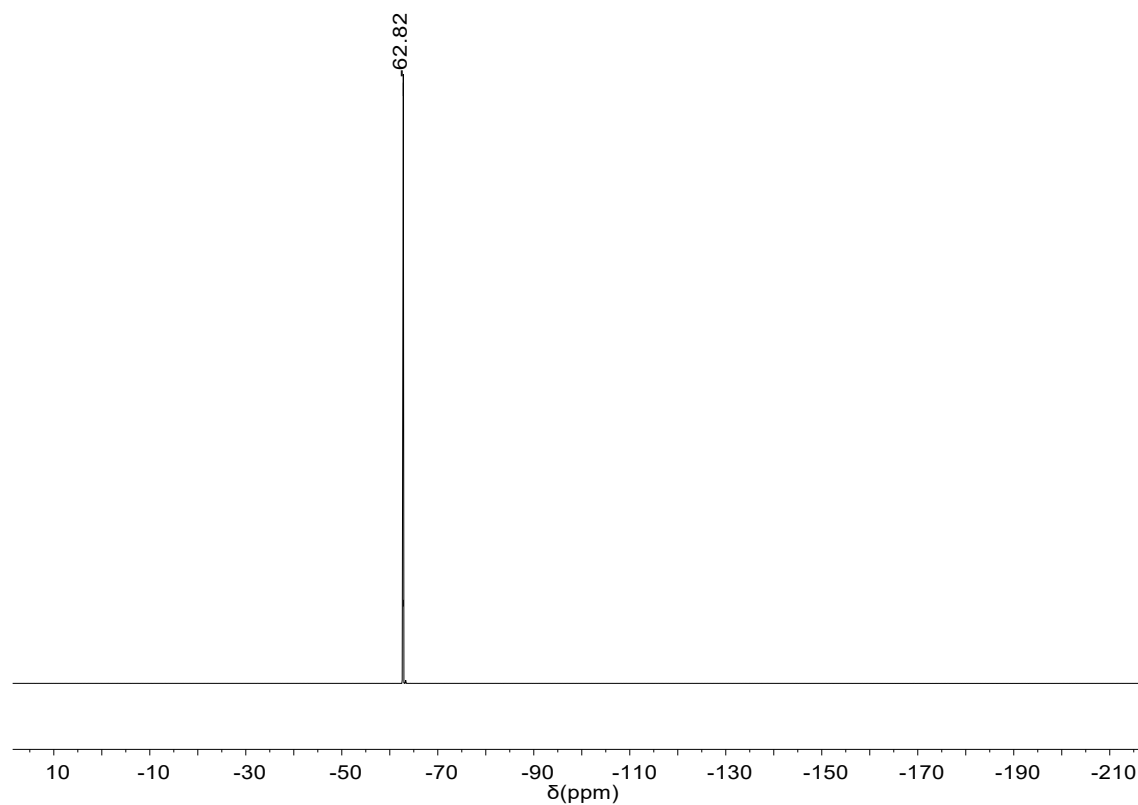

**Figure S19.**  $^{19}\text{F}$ -NMR spectrum (375 MHz,  $\text{CD}_2\text{Cl}_2$ , 25 °C) of  $[\text{MoO}(\text{CHCMe}_3)(\text{OHMT})(\text{IMes})][\text{B}(\text{Ar}^{\text{F}})_4]$  (**Mo-6**).

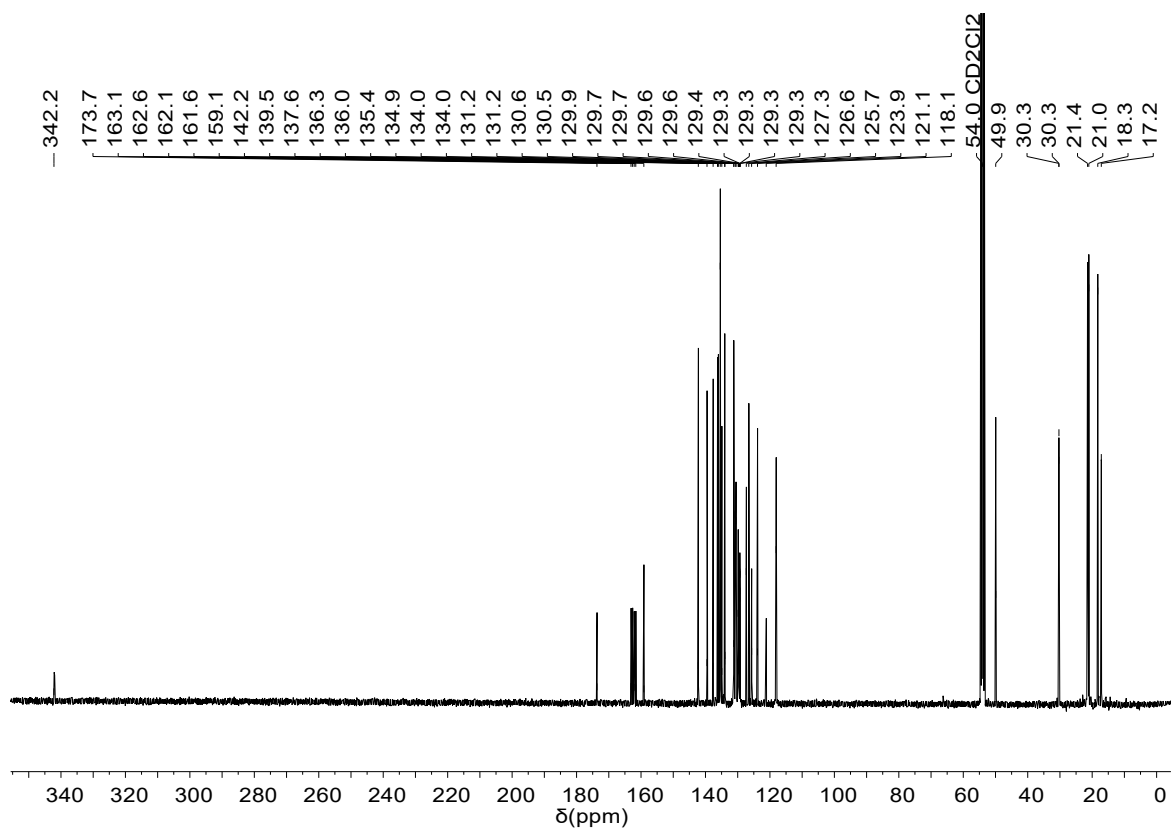

**Figure S20.**  $^{13}\text{C}$ -NMR spectrum (100 MHz,  $\text{CD}_2\text{Cl}_2$ , 25 °C) of  $[\text{MoO}(\text{CHCMe}_3)(\text{OHMT})(\text{IMes})][\text{B}(\text{Ar}^{\text{F}})_4]$  (**Mo-6**).

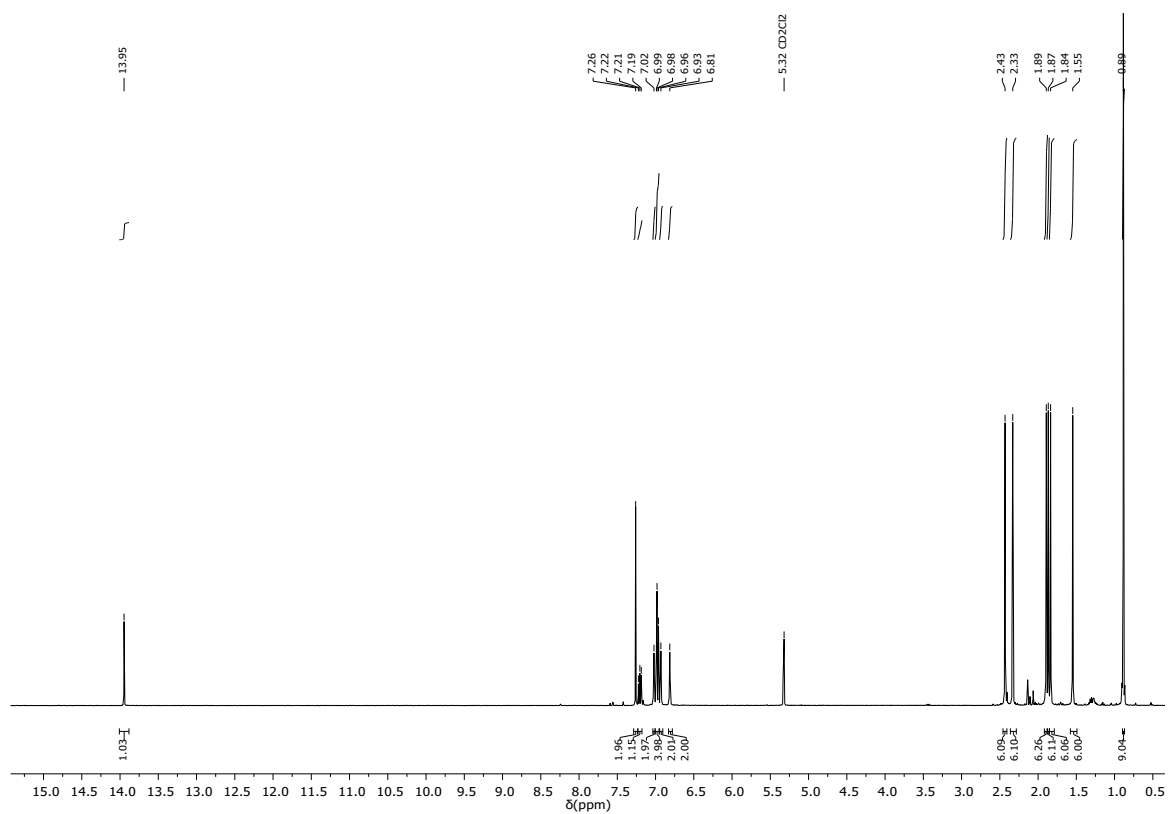

**Figure S21.** <sup>1</sup>H-NMR spectrum (375 MHz, CD<sub>2</sub>Cl<sub>2</sub>, 25 °C) of [MoO(CHCMe<sub>3</sub>)(OHMT)(IMes)][Al(OC<sub>4</sub>F<sub>9</sub>)<sub>4</sub>] (**Mo-7**).

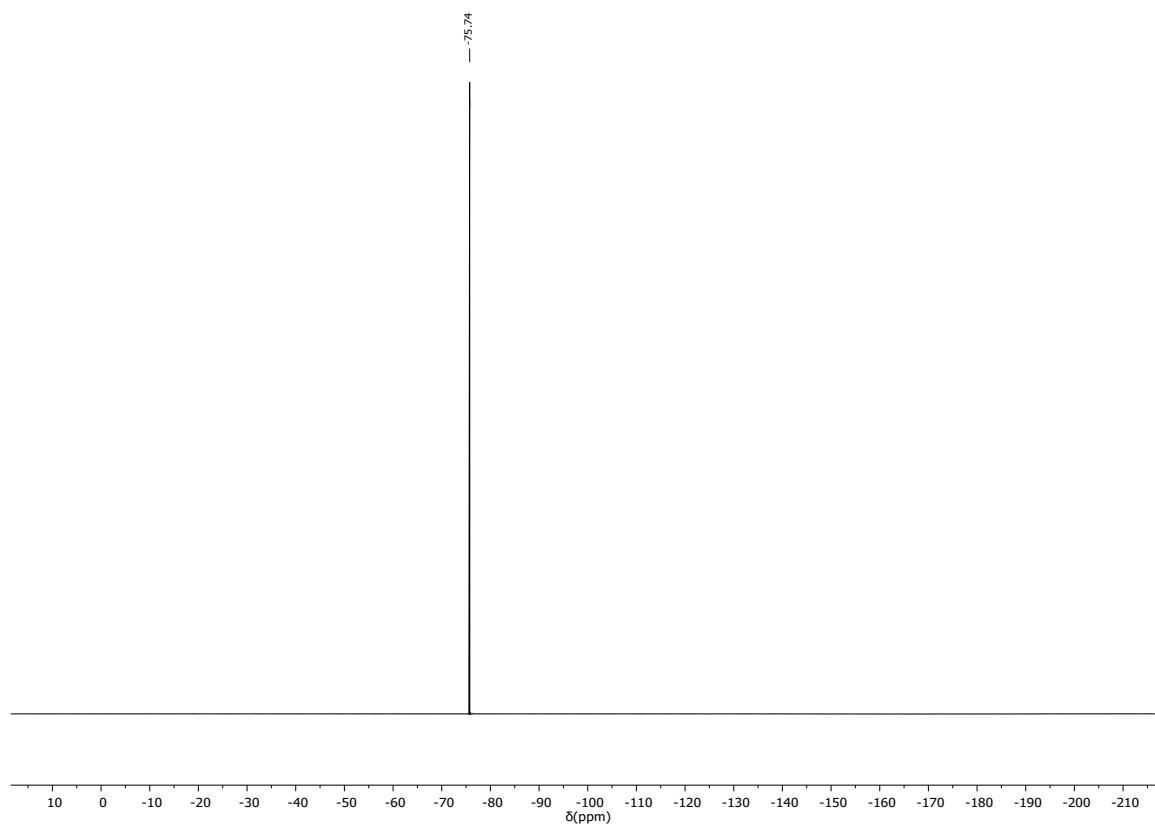

**Figure S22.**  $^1\text{H-NMR}$  spectrum (400 MHz,  $\text{CD}_2\text{Cl}_2$ , 25 °C) of  $[\text{MoO}(\text{CHCMe}_3)(\text{OHMT})(\text{IMes})][\text{Al}(\text{OC}_4\text{F}_9)_4]$  (**Mo-7**).

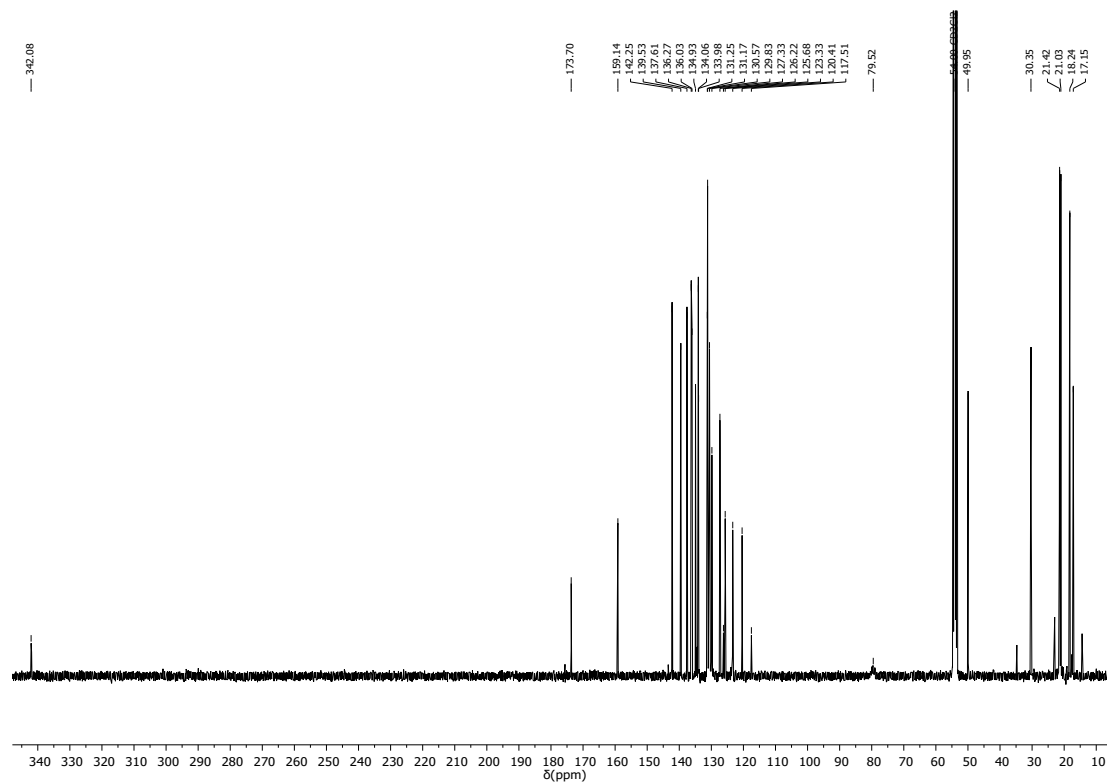

**Figure S23.**  $^{13}\text{C-NMR}$  spectrum (100 MHz,  $\text{CD}_2\text{Cl}_2$ , 25 °C) of  $[\text{MoO}(\text{CHCMe}_3)(\text{OHMT})(\text{IMes})][\text{Al}(\text{OC}_4\text{F}_9)_4]$  (**Mo-7**).



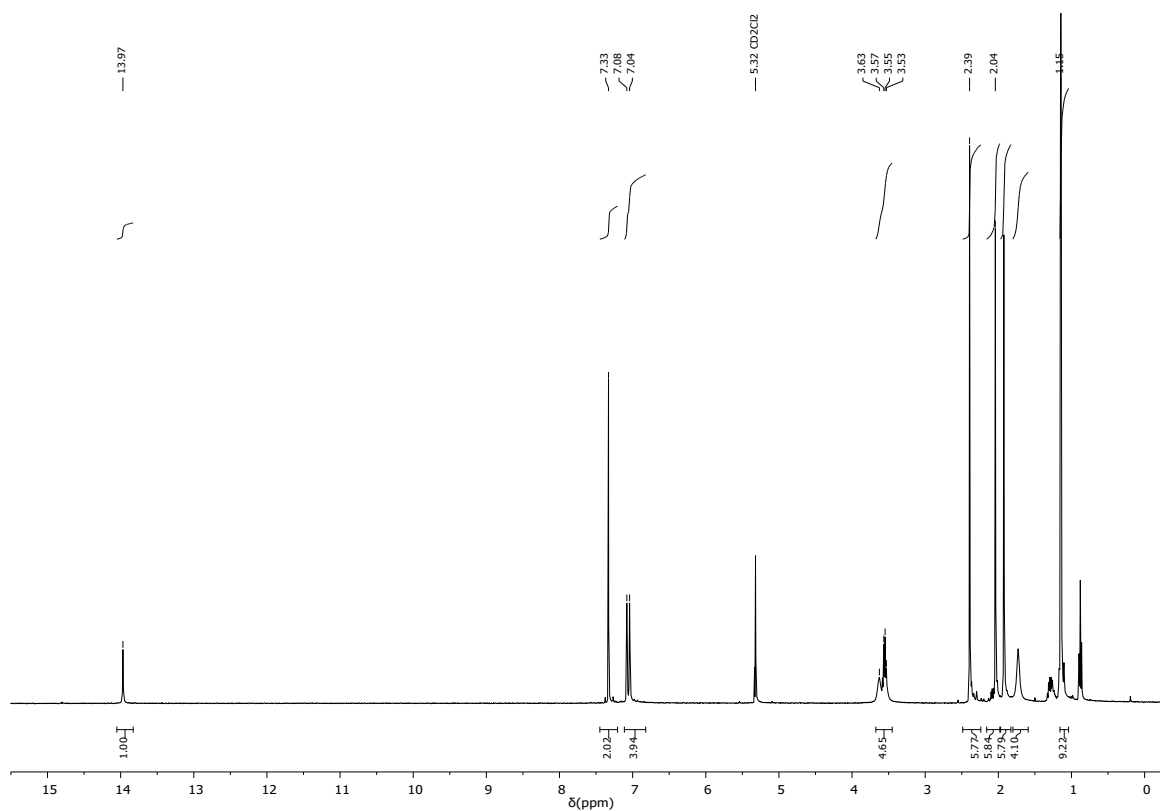

**Figure S24.**  $^1\text{H-NMR}$  spectrum (400 MHz,  $\text{CD}_2\text{Cl}_2$ , 25 °C) of  $[\text{MoO}(\text{CHCMe}_3)(\text{OC}_6\text{F}_5)(\text{IMes})(\text{THF})][\text{Al}(\text{OC}_4\text{F}_9)_4]$  (**Mo-8**).

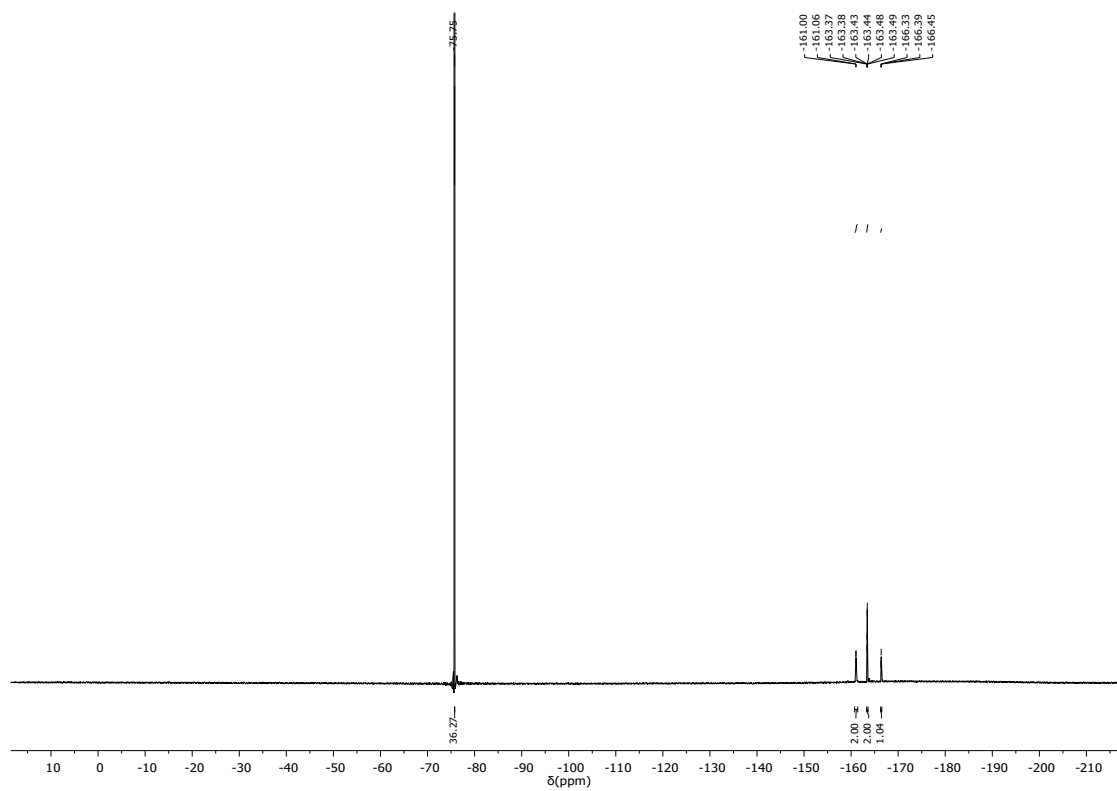

**Figure S25.**  $^{19}\text{F-NMR}$  spectrum (375 MHz,  $\text{CD}_2\text{Cl}_2$ , 25 °C) of  $[\text{MoO}(\text{CHCMe}_3)(\text{OC}_6\text{F}_5)(\text{IMes})(\text{THF})][\text{Al}(\text{OC}_4\text{F}_9)_4]$  (**Mo-8**).

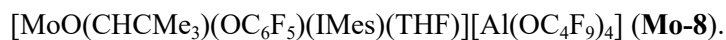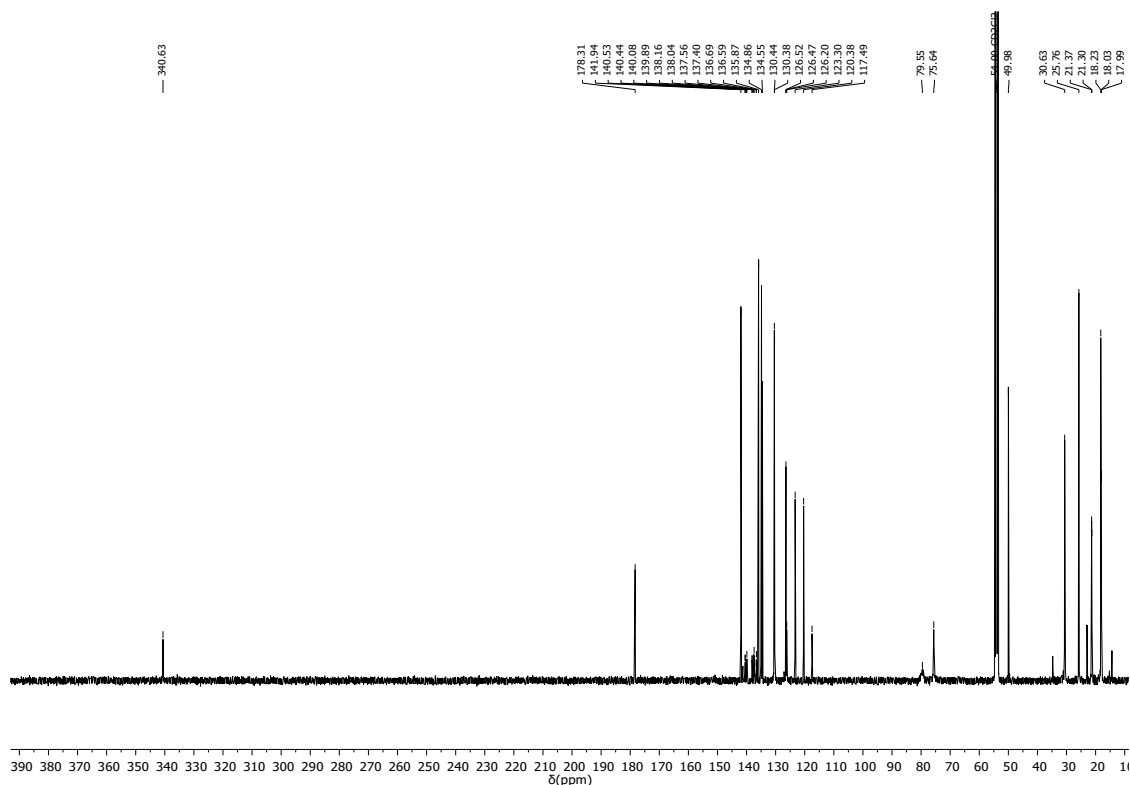

**Figure S26.**  $^{13}\text{C}$ -NMR spectrum (400 MHz,  $\text{CD}_2\text{Cl}_2$ , 25 °C) of  $[\text{MoO}(\text{CHCMe}_3)(\text{OC}_6\text{F}_5)(\text{IMes})(\text{THF})][\text{Al}(\text{OC}_4\text{F}_9)_4]$  (**Mo-8**).

## 4. Single Crystal X-Ray Crystallography Data

**Table S4.** Crystal data and structure refinement for **Mo-2**.

|                             |                                                                                                                                                   |
|-----------------------------|---------------------------------------------------------------------------------------------------------------------------------------------------|
| Empirical formula           | $\text{C}_{37}\text{H}_{30}\text{Cl}_2\text{F}_{18}\text{MoN}_2\text{O}_4$                                                                        |
| Formula weight              | 1075.47                                                                                                                                           |
| Temperature                 | 135(2) K                                                                                                                                          |
| Wavelength                  | 0.71073 Å                                                                                                                                         |
| Crystal system, space group | Triclinic, $\bar{P}1$                                                                                                                             |
| Unit cell dimensions        | $a = 11.8411(6)$ Å, $\alpha = 80.252(2)^\circ$<br>$b = 12.4718(7)$ Å, $\beta = 81.208(2)^\circ$<br>$c = 15.3713(8)$ Å, $\gamma = 66.112(3)^\circ$ |
| Volume                      | 2036.64(19) Å <sup>3</sup>                                                                                                                        |

*Supporting Information*

|                                    |                                             |
|------------------------------------|---------------------------------------------|
| Z, Calculated density              | 2, 1.754 Mg/m <sup>3</sup>                  |
| Absorption coefficient             | 0.579 mm <sup>-1</sup>                      |
| F(000)                             | 1072                                        |
| Crystal size                       | 0.323 x 0.200 x 0.191 mm                    |
| Theta range for data collection    | 1.799 to 28.294°                            |
| Limiting indices                   | -15<=h<=15, -16<=k<=16, -19<=l<=20          |
| Reflections collected / unique     | 43911 / 10061 [R(int) = 0.0211]             |
| Completeness to $\Theta = 25.242$  | 99.90%                                      |
| Absorption correction              | Semi-empirical from equivalents             |
| Max. and min. transmission         | 0.7457 and 0.6826                           |
| Refinement method                  | Full-matrix least-squares on F <sup>2</sup> |
| Data / restraints / parameters     | 10061 / 0 / 588                             |
| Goodness-of-fit on F <sup>2</sup>  | 1.024                                       |
| Final R indices [I>2 $\sigma$ (I)] | R1 = 0.0528, wR2 = 0.1401                   |
| R indices (all data)               | R1 = 0.0602, wR2 = 0.1443                   |
| Extinction coefficient             | n/a                                         |
| Largest diff. peak and hole        | 2.354 and -0.842 e. $\text{\AA}^{-3}$       |

**Table S5.** Atomic coordinates ( $\times 10^4$ ) and equivalent isotropic displacement parameters ( $\text{\AA}^2 \times 10^3$ ) for **Mo-2**. U(eq) is defined as one third of the trace of the orthogonalized  $U_{ij}$  tensor.

|     | x       | y       | z       | U(eq) |
|-----|---------|---------|---------|-------|
| MO1 | 1646(1) | 4416(1) | 2591(1) | 18(1) |
| CL1 | 3128(1) | 8597(1) | 1715(1) | 32(1) |

*Supporting Information*

|       |          |          |         |       |
|-------|----------|----------|---------|-------|
| CL2   | 5444(1)  | 6304(1)  | 2851(1) | 32(1) |
| O(1)  | 1635(2)  | 4349(2)  | 3682(2) | 26(1) |
| F(1)  | 4373(3)  | 1141(2)  | 566(2)  | 56(1) |
| N(1)  | 2309(2)  | 6810(2)  | 2051(2) | 21(1) |
| C(1)  | 2633(3)  | 5668(3)  | 2430(2) | 19(1) |
| O(2)  | 2665(2)  | 3865(2)  | 1443(2) | 26(1) |
| N(2)  | 3743(2)  | 5393(2)  | 2747(2) | 20(1) |
| F(2)  | 2789(3)  | 1370(2)  | 1490(2) | 53(1) |
| C(2)  | 3222(3)  | 7220(3)  | 2121(2) | 23(1) |
| O(3)  | 1148(2)  | 2999(2)  | 2649(2) | 24(1) |
| C(3)  | 4107(3)  | 6338(3)  | 2556(2) | 23(1) |
| F(3)  | 4298(3)  | 1686(3)  | 1818(2) | 62(1) |
| O(4)  | -4024(2) | 8963(2)  | 4134(2) | 37(1) |
| F(4)  | 5167(2)  | 2847(3)  | 373(2)  | 53(1) |
| C(4)  | 1123(3)  | 7630(3)  | 1756(2) | 23(1) |
| F(5)  | 4097(3)  | 3063(3)  | -670(2) | 59(1) |
| C(5)  | 304(3)   | 8380(3)  | 2361(2) | 26(1) |
| F(6)  | 3843(3)  | 4536(2)  | 6(2)    | 64(1) |
| C(6)  | -788(3)  | 9235(3)  | 2051(3) | 33(1) |
| F(7)  | 888(2)   | 3515(3)  | 831(2)  | 55(1) |
| C(7)  | -1064(3) | 9352(3)  | 1187(3) | 36(1) |
| F(8)  | 2121(3)  | 2464(3)  | -167(2) | 66(1) |
| C(8)  | -215(4)  | 8600(3)  | 611(3)  | 34(1) |
| C(9)  | 898(3)   | 7725(3)  | 878(2)  | 27(1) |
| F(9)  | 1665(3)  | 4336(3)  | -282(2) | 66(1) |
| F(10) | -1349(2) | 2694(2)  | 4194(2) | 39(1) |
| C(10) | 585(4)   | 8265(4)  | 3297(3) | 35(1) |
| F(11) | -1257(2) | 4236(2)  | 3388(2) | 51(1) |
| C(11) | -2275(4) | 10268(4) | 874(4)  | 53(1) |
| F(12) | -89(2)   | 3428(3)  | 4435(2) | 49(1) |
| C(12) | 1805(4)  | 6914(4)  | 251(2)  | 35(1) |
| F(13) | 581(3)   | 1461(3)  | 1892(2) | 50(1) |
| C(13) | 4468(3)  | 4304(3)  | 3251(2) | 22(1) |
| F(14) | -649(3)  | 1251(3)  | 2994(2) | 62(1) |
| C(14) | 4211(3)  | 4185(3)  | 4169(2) | 25(1) |
| C(15) | 4978(4)  | 3143(3)  | 4636(2) | 32(1) |
| F(15) | -1094(3) | 2920(3)  | 2177(2) | 74(1) |
| F(16) | 2027(2)  | 498(2)   | 3190(2) | 47(1) |
| C(16) | 5965(4)  | 2284(3)  | 4219(3) | 34(1) |
| F(17) | 2126(3)  | 1584(3)  | 4062(2) | 64(1) |
| C(17) | 6199(3)  | 2468(3)  | 3304(3) | 34(1) |
| F(18) | 756(3)   | 857(3)   | 4356(2) | 74(1) |
| C(18) | 5470(3)  | 3483(3)  | 2809(2) | 28(1) |
| C(19) | 3216(4)  | 5135(3)  | 4656(2) | 32(1) |
| C(20) | 6805(4)  | 1192(4)  | 4743(3) | 49(1) |

Supporting Information

|       |          |         |         |       |
|-------|----------|---------|---------|-------|
| C(21) | 5842(4)  | 3738(4) | 1839(3) | 42(1) |
| C(22) | 3040(3)  | 3143(3) | 798(2)  | 26(1) |
| C(23) | 3634(4)  | 1813(4) | 1167(3) | 38(1) |
| C(24) | 4025(4)  | 3425(4) | 104(3)  | 36(1) |
| C(25) | 1883(5)  | 3364(4) | 289(3)  | 45(1) |
| C(26) | 446(3)   | 2450(3) | 3134(2) | 25(1) |
| C(27) | -571(3)  | 3192(3) | 3801(3) | 32(1) |
| C(28) | -179(4)  | 2029(4) | 2527(3) | 38(1) |
| C(29) | 1334(4)  | 1309(4) | 3700(3) | 39(1) |
| C(30) | 82(3)    | 5680(3) | 2357(2) | 23(1) |
| C(31) | -1004(3) | 6487(3) | 2826(2) | 23(1) |
| C(32) | -1110(3) | 6520(3) | 3743(2) | 27(1) |
| C(33) | -2140(3) | 7334(3) | 4157(2) | 30(1) |
| C(34) | -3075(3) | 8149(3) | 3664(3) | 29(1) |
| C(35) | -3025(3) | 8113(3) | 2764(2) | 28(1) |
| C(36) | -1993(3) | 7277(3) | 2353(2) | 27(1) |
| C(37) | -4892(4) | 9933(4) | 3627(3) | 45(1) |

**Table S6.** Bond lengths [Å] and angles [°] for **Mo-2**.

|            |          |
|------------|----------|
| MO1-O(1)   | 1.664(2) |
| MO1-C(30)  | 1.921(3) |
| MO1-O(2)   | 2.033(2) |
| MO1-O(3)   | 2.062(2) |
| MO1-C(1)   | 2.263(3) |
| CL1-C(2)   | 1.690(3) |
| CL2-C(3)   | 1.695(3) |
| F(1)-C(23) | 1.321(5) |
| N(1)-C(1)  | 1.364(4) |
| N(1)-C(2)  | 1.393(4) |
| N(1)-C(4)  | 1.449(4) |
| C(1)-N(2)  | 1.363(4) |
| O(2)-C(22) | 1.354(4) |
| N(2)-C(3)  | 1.384(4) |
| N(2)-C(13) | 1.444(4) |
| F(2)-C(23) | 1.325(5) |
| C(2)-C(3)  | 1.337(5) |
| O(3)-C(26) | 1.347(4) |
| F(3)-C(23) | 1.315(5) |
| O(4)-C(34) | 1.375(4) |
| O(4)-C(37) | 1.431(5) |
| F(4)-C(24) | 1.341(5) |
| C(4)-C(9)  | 1.390(5) |
| C(4)-C(5)  | 1.403(5) |
| F(5)-C(24) | 1.322(5) |

*Supporting Information*

|              |          |
|--------------|----------|
| C(5)-C(6)    | 1.392(5) |
| C(5)-C(10)   | 1.495(5) |
| F(6)-C(24)   | 1.298(5) |
| C(6)-C(7)    | 1.385(6) |
| C(6)-H(6)    | 0.95     |
| F(7)-C(25)   | 1.301(5) |
| C(7)-C(8)    | 1.386(6) |
| C(7)-C(11)   | 1.514(5) |
| F(8)-C(25)   | 1.334(5) |
| C(8)-C(9)    | 1.395(5) |
| C(8)-H(8)    | 0.95     |
| C(9)-C(12)   | 1.497(5) |
| F(9)-C(25)   | 1.328(6) |
| F(10)-C(27)  | 1.329(4) |
| C(10)-H(10A) | 0.98     |
| C(10)-H(10B) | 0.98     |
| C(10)-H(10C) | 0.98     |
| F(11)-C(27)  | 1.334(5) |
| C(11)-H(11A) | 0.98     |
| C(11)-H(11B) | 0.98     |
| C(11)-H(11C) | 0.98     |
| F(12)-C(27)  | 1.330(5) |
| C(12)-H(12A) | 0.98     |
| C(12)-H(12B) | 0.98     |
| C(12)-H(12C) | 0.98     |
| F(13)-C(28)  | 1.309(5) |
| C(13)-C(18)  | 1.387(5) |
| C(13)-C(14)  | 1.392(4) |
| F(14)-C(28)  | 1.358(5) |
| C(14)-C(15)  | 1.399(5) |
| C(14)-C(19)  | 1.501(5) |
| C(15)-C(16)  | 1.383(6) |
| C(15)-H(15)  | 0.95     |
| F(15)-C(28)  | 1.304(5) |
| F(16)-C(29)  | 1.309(5) |
| C(16)-C(17)  | 1.391(6) |
| C(16)-C(20)  | 1.506(5) |
| F(17)-C(29)  | 1.339(5) |
| C(17)-C(18)  | 1.384(5) |
| C(17)-H(17)  | 0.95     |
| F(18)-C(29)  | 1.309(5) |
| C(18)-C(21)  | 1.507(5) |
| C(19)-H(19A) | 0.98     |
| C(19)-H(19B) | 0.98     |
| C(19)-H(19C) | 0.98     |

*Supporting Information*

|                |            |
|----------------|------------|
| C(20)-H(20A)   | 0.98       |
| C(20)-H(20B)   | 0.98       |
| C(20)-H(20C)   | 0.98       |
| C(21)-H(21A)   | 0.98       |
| C(21)-H(21B)   | 0.98       |
| C(21)-H(21C)   | 0.98       |
| C(22)-C(23)    | 1.558(5)   |
| C(22)-C(24)    | 1.564(5)   |
| C(22)-C(25)    | 1.585(6)   |
| C(26)-C(28)    | 1.545(5)   |
| C(26)-C(27)    | 1.549(5)   |
| C(26)-C(29)    | 1.593(5)   |
| C(30)-C(31)    | 1.450(4)   |
| C(30)-H(30)    | 1.03(4)    |
| C(31)-C(36)    | 1.398(5)   |
| C(31)-C(32)    | 1.401(5)   |
| C(32)-C(33)    | 1.379(5)   |
| C(32)-H(32)    | 0.95       |
| C(33)-C(34)    | 1.385(5)   |
| C(33)-H(33)    | 0.95       |
| C(34)-C(35)    | 1.383(5)   |
| C(35)-C(36)    | 1.390(5)   |
| C(35)-H(35)    | 0.95       |
| C(36)-H(36)    | 0.95       |
| C(37)-H(37A)   | 0.98       |
| C(37)-H(37B)   | 0.98       |
| C(37)-H(37C)   | 0.98       |
| O(1)-MO1-C(30) | 102.28(13) |
| O(1)-MO1-O(2)  | 146.29(11) |
| C(30)-MO1-O(2) | 110.88(12) |
| O(1)-MO1-O(3)  | 95.40(10)  |
| C(30)-MO1-O(3) | 99.27(11)  |
| O(2)-MO1-O(3)  | 85.36(9)   |
| O(1)-MO1-C(1)  | 87.88(11)  |
| C(30)-MO1-C(1) | 92.56(12)  |
| O(2)-MO1-C(1)  | 84.81(10)  |
| O(3)-MO1-C(1)  | 166.73(10) |
| C(1)-N(1)-C(2) | 110.6(3)   |
| C(1)-N(1)-C(4) | 128.5(3)   |
| C(2)-N(1)-C(4) | 119.9(3)   |
| N(1)-C(1)-N(2) | 104.2(3)   |
| N(1)-C(1)-MO1  | 131.6(2)   |
| N(2)-C(1)-MO1  | 124.1(2)   |
| C(22)-O(2)-MO1 | 151.6(2)   |

*Supporting Information*

|                     |          |
|---------------------|----------|
| C(1)-N(2)-C(3)      | 111.0(3) |
| C(1)-N(2)-C(13)     | 127.3(3) |
| C(3)-N(2)-C(13)     | 121.7(3) |
| C(3)-C(2)-N(1)      | 107.0(3) |
| C(3)-C(2)-CL1       | 129.7(3) |
| N(1)-C(2)-CL1       | 123.3(3) |
| C(26)-O(3)-MO1      | 142.8(2) |
| C(2)-C(3)-N(2)      | 107.2(3) |
| C(2)-C(3)-CL2       | 129.2(3) |
| N(2)-C(3)-CL2       | 123.6(3) |
| C(34)-O(4)-C(37)    | 116.6(3) |
| C(9)-C(4)-C(5)      | 123.1(3) |
| C(9)-C(4)-N(1)      | 119.6(3) |
| C(5)-C(4)-N(1)      | 116.9(3) |
| C(6)-C(5)-C(4)      | 116.7(3) |
| C(6)-C(5)-C(10)     | 121.5(3) |
| C(4)-C(5)-C(10)     | 121.7(3) |
| C(7)-C(6)-C(5)      | 122.3(3) |
| C(7)-C(6)-H(6)      | 118.9    |
| C(5)-C(6)-H(6)      | 118.9    |
| C(6)-C(7)-C(8)      | 118.8(3) |
| C(6)-C(7)-C(11)     | 121.1(4) |
| C(8)-C(7)-C(11)     | 120.1(4) |
| C(7)-C(8)-C(9)      | 121.9(4) |
| C(7)-C(8)-H(8)      | 119      |
| C(9)-C(8)-H(8)      | 119      |
| C(4)-C(9)-C(8)      | 117.2(3) |
| C(4)-C(9)-C(12)     | 121.4(3) |
| C(8)-C(9)-C(12)     | 121.4(3) |
| C(5)-C(10)-H(10A)   | 109.5    |
| C(5)-C(10)-H(10B)   | 109.5    |
| H(10A)-C(10)-H(10B) | 109.5    |
| C(5)-C(10)-H(10C)   | 109.5    |
| H(10A)-C(10)-H(10C) | 109.5    |
| H(10B)-C(10)-H(10C) | 109.5    |
| C(7)-C(11)-H(11A)   | 109.5    |
| C(7)-C(11)-H(11B)   | 109.5    |
| H(11A)-C(11)-H(11B) | 109.5    |
| C(7)-C(11)-H(11C)   | 109.5    |
| H(11A)-C(11)-H(11C) | 109.5    |
| H(11B)-C(11)-H(11C) | 109.5    |
| C(9)-C(12)-H(12A)   | 109.5    |
| C(9)-C(12)-H(12B)   | 109.5    |
| H(12A)-C(12)-H(12B) | 109.5    |
| C(9)-C(12)-H(12C)   | 109.5    |



*Supporting Information*

|                     |          |
|---------------------|----------|
| H(12A)-C(12)-H(12C) | 109.5    |
| H(12B)-C(12)-H(12C) | 109.5    |
| C(18)-C(13)-C(14)   | 123.0(3) |
| C(18)-C(13)-N(2)    | 118.3(3) |
| C(14)-C(13)-N(2)    | 118.4(3) |
| C(13)-C(14)-C(15)   | 116.5(3) |
| C(13)-C(14)-C(19)   | 123.0(3) |
| C(15)-C(14)-C(19)   | 120.4(3) |
| C(16)-C(15)-C(14)   | 122.3(3) |
| C(16)-C(15)-H(15)   | 118.8    |
| C(14)-C(15)-H(15)   | 118.8    |
| C(15)-C(16)-C(17)   | 118.6(3) |
| C(15)-C(16)-C(20)   | 121.2(4) |
| C(17)-C(16)-C(20)   | 120.2(4) |
| C(18)-C(17)-C(16)   | 121.5(3) |
| C(18)-C(17)-H(17)   | 119.3    |
| C(16)-C(17)-H(17)   | 119.3    |
| C(17)-C(18)-C(13)   | 118.0(3) |
| C(17)-C(18)-C(21)   | 120.4(3) |
| C(13)-C(18)-C(21)   | 121.3(3) |
| C(14)-C(19)-H(19A)  | 109.5    |
| C(14)-C(19)-H(19B)  | 109.5    |
| H(19A)-C(19)-H(19B) | 109.5    |
| C(14)-C(19)-H(19C)  | 109.5    |
| H(19A)-C(19)-H(19C) | 109.5    |
| H(19B)-C(19)-H(19C) | 109.5    |
| C(16)-C(20)-H(20A)  | 109.5    |
| C(16)-C(20)-H(20B)  | 109.5    |
| H(20A)-C(20)-H(20B) | 109.5    |
| C(16)-C(20)-H(20C)  | 109.5    |
| H(20A)-C(20)-H(20C) | 109.5    |
| H(20B)-C(20)-H(20C) | 109.5    |
| C(18)-C(21)-H(21A)  | 109.5    |
| C(18)-C(21)-H(21B)  | 109.5    |
| H(21A)-C(21)-H(21B) | 109.5    |
| C(18)-C(21)-H(21C)  | 109.5    |
| H(21A)-C(21)-H(21C) | 109.5    |
| H(21B)-C(21)-H(21C) | 109.5    |
| O(2)-C(22)-C(23)    | 112.7(3) |
| O(2)-C(22)-C(24)    | 110.8(3) |
| C(23)-C(22)-C(24)   | 107.5(3) |
| O(2)-C(22)-C(25)    | 108.9(3) |
| C(23)-C(22)-C(25)   | 109.5(3) |
| C(24)-C(22)-C(25)   | 107.4(3) |
| F(3)-C(23)-F(1)     | 107.5(4) |

*Supporting Information*

|                   |          |
|-------------------|----------|
| F(3)-C(23)-F(2)   | 107.2(4) |
| F(1)-C(23)-F(2)   | 106.7(3) |
| F(3)-C(23)-C(22)  | 109.7(3) |
| F(1)-C(23)-C(22)  | 113.2(3) |
| F(2)-C(23)-C(22)  | 112.3(3) |
| F(6)-C(24)-F(5)   | 110.7(4) |
| F(6)-C(24)-F(4)   | 105.4(4) |
| F(5)-C(24)-F(4)   | 104.7(3) |
| F(6)-C(24)-C(22)  | 112.2(3) |
| F(5)-C(24)-C(22)  | 112.6(3) |
| F(4)-C(24)-C(22)  | 110.7(3) |
| F(7)-C(25)-F(9)   | 107.9(4) |
| F(7)-C(25)-F(8)   | 109.8(4) |
| F(9)-C(25)-F(8)   | 108.0(4) |
| F(7)-C(25)-C(22)  | 111.6(3) |
| F(9)-C(25)-C(22)  | 109.1(4) |
| F(8)-C(25)-C(22)  | 110.4(4) |
| O(3)-C(26)-C(28)  | 110.8(3) |
| O(3)-C(26)-C(27)  | 115.1(3) |
| C(28)-C(26)-C(27) | 108.3(3) |
| O(3)-C(26)-C(29)  | 108.1(3) |
| C(28)-C(26)-C(29) | 107.6(3) |
| C(27)-C(26)-C(29) | 106.7(3) |
| F(12)-C(27)-F(10) | 107.4(3) |
| F(12)-C(27)-F(11) | 105.9(3) |
| F(10)-C(27)-F(11) | 106.8(3) |
| F(12)-C(27)-C(26) | 111.9(3) |
| F(10)-C(27)-C(26) | 114.2(3) |
| F(11)-C(27)-C(26) | 110.1(3) |
| F(15)-C(28)-F(13) | 108.9(4) |
| F(15)-C(28)-F(14) | 107.7(4) |
| F(13)-C(28)-F(14) | 104.7(3) |
| F(15)-C(28)-C(26) | 110.5(3) |
| F(13)-C(28)-C(26) | 113.8(3) |
| F(14)-C(28)-C(26) | 110.9(3) |
| F(18)-C(29)-F(16) | 109.7(4) |
| F(18)-C(29)-F(17) | 106.3(4) |
| F(16)-C(29)-F(17) | 105.5(3) |
| F(18)-C(29)-C(26) | 114.4(3) |
| F(16)-C(29)-C(26) | 110.7(3) |
| F(17)-C(29)-C(26) | 109.7(3) |
| C(31)-C(30)-MO1   | 139.9(3) |
| C(31)-C(30)-H(30) | 111(2)   |
| MO1-C(30)-H(30)   | 109(2)   |
| C(36)-C(31)-C(32) | 117.8(3) |

|                     |          |
|---------------------|----------|
| C(36)-C(31)-C(30)   | 119.3(3) |
| C(32)-C(31)-C(30)   | 122.9(3) |
| C(33)-C(32)-C(31)   | 120.9(3) |
| C(33)-C(32)-H(32)   | 119.6    |
| C(31)-C(32)-H(32)   | 119.6    |
| C(32)-C(33)-C(34)   | 120.1(3) |
| C(32)-C(33)-H(33)   | 120      |
| C(34)-C(33)-H(33)   | 120      |
| O(4)-C(34)-C(35)    | 124.1(3) |
| O(4)-C(34)-C(33)    | 115.2(3) |
| C(35)-C(34)-C(33)   | 120.6(3) |
| C(34)-C(35)-C(36)   | 118.9(3) |
| C(34)-C(35)-H(35)   | 120.5    |
| C(36)-C(35)-H(35)   | 120.5    |
| C(35)-C(36)-C(31)   | 121.5(3) |
| C(35)-C(36)-H(36)   | 119.2    |
| C(31)-C(36)-H(36)   | 119.2    |
| O(4)-C(37)-H(37A)   | 109.5    |
| O(4)-C(37)-H(37B)   | 109.5    |
| H(37A)-C(37)-H(37B) | 109.5    |
| O(4)-C(37)-H(37C)   | 109.5    |
| H(37A)-C(37)-H(37C) | 109.5    |
| H(37B)-C(37)-H(37C) | 109.5    |

**Table S7.** Anisotropic displacement parameters ( $\text{\AA}^2 \times 10^3$ ) for **Mo-2**. The anisotropic displacement factor exponent takes the form:  $-2 \pi^2 [h^2 a^{*2} U_{11} + \dots + 2 h k a^* b^* U_{12}]$ .

|      | U11   | U22   | U33   | U23    | U13   | U12    |
|------|-------|-------|-------|--------|-------|--------|
| MO1  | 20(1) | 18(1) | 18(1) | -4(1)  | 1(1)  | -9(1)  |
| CL1  | 33(1) | 20(1) | 44(1) | -2(1)  | 0(1)  | -15(1) |
| CL2  | 31(1) | 42(1) | 33(1) | -1(1)  | -7(1) | -23(1) |
| O(1) | 32(1) | 27(1) | 24(1) | -2(1)  | -3(1) | -16(1) |
| F(1) | 54(2) | 31(1) | 71(2) | -20(1) | 24(1) | -9(1)  |
| N(1) | 22(1) | 20(1) | 23(1) | -4(1)  | -1(1) | -10(1) |
| C(1) | 21(1) | 21(1) | 16(1) | -4(1)  | 0(1)  | -9(1)  |
| O(2) | 36(1) | 24(1) | 20(1) | -8(1)  | 6(1)  | -14(1) |
| N(2) | 22(1) | 21(1) | 17(1) | -1(1)  | -1(1) | -10(1) |
| F(2) | 61(2) | 32(1) | 62(2) | -13(1) | 20(1) | -22(1) |
| C(2) | 26(2) | 20(1) | 26(2) | -5(1)  | 1(1)  | -12(1) |

*Supporting Information*

|       |       |       |       |        |        |        |
|-------|-------|-------|-------|--------|--------|--------|
| O(3)  | 27(1) | 22(1) | 27(1) | -7(1)  | 5(1)   | -14(1) |
| C(3)  | 26(2) | 28(2) | 21(1) | -5(1)  | 0(1)   | -17(1) |
| F(3)  | 70(2) | 45(2) | 62(2) | 6(1)   | -32(2) | -9(1)  |
| O(4)  | 29(1) | 27(1) | 44(2) | -4(1)  | 4(1)   | -2(1)  |
| F(4)  | 37(1) | 60(2) | 61(2) | -15(1) | 10(1)  | -19(1) |
| C(4)  | 21(1) | 18(1) | 31(2) | -2(1)  | -1(1)  | -9(1)  |
| F(5)  | 72(2) | 70(2) | 31(1) | -19(1) | 19(1)  | -27(2) |
| C(5)  | 26(2) | 19(1) | 37(2) | -6(1)  | 1(1)   | -11(1) |
| F(6)  | 78(2) | 40(1) | 64(2) | -10(1) | 41(2)  | -29(1) |
| C(6)  | 23(2) | 19(2) | 56(2) | -8(2)  | 1(2)   | -8(1)  |
| F(7)  | 35(1) | 76(2) | 53(2) | -5(1)  | -12(1) | -18(1) |
| C(7)  | 26(2) | 21(2) | 57(2) | 8(2)   | -9(2)  | -8(1)  |
| F(8)  | 87(2) | 84(2) | 47(2) | -24(2) | -17(2) | -42(2) |
| C(8)  | 33(2) | 30(2) | 38(2) | 9(2)   | -12(2) | -14(2) |
| C(9)  | 29(2) | 22(2) | 31(2) | 1(1)   | -2(1)  | -12(1) |
| F(9)  | 62(2) | 73(2) | 42(2) | 12(1)  | -17(1) | -8(2)  |
| F(10) | 38(1) | 34(1) | 49(1) | -12(1) | 16(1)  | -22(1) |
| C(10) | 33(2) | 36(2) | 39(2) | -17(2) | 5(2)   | -14(2) |
| F(11) | 44(1) | 26(1) | 66(2) | -4(1)  | 17(1)  | -6(1)  |
| C(11) | 34(2) | 34(2) | 78(4) | 11(2)  | -17(2) | -3(2)  |
| F(12) | 45(1) | 65(2) | 51(2) | -36(1) | 16(1)  | -32(1) |
| C(12) | 39(2) | 35(2) | 28(2) | -3(1)  | -2(2)  | -12(2) |
| F(13) | 53(2) | 65(2) | 46(1) | -31(1) | 6(1)   | -33(1) |
| C(13) | 23(1) | 23(1) | 21(1) | 0(1)   | -4(1)  | -11(1) |
| F(14) | 70(2) | 67(2) | 74(2) | -30(2) | 19(2)  | -53(2) |
| C(14) | 28(2) | 29(2) | 21(2) | -1(1)  | -2(1)  | -15(1) |
| C(15) | 36(2) | 38(2) | 25(2) | 8(1)   | -7(1)  | -21(2) |
| F(15) | 67(2) | 63(2) | 85(2) | -17(2) | -46(2) | -2(2)  |
| F(16) | 44(1) | 32(1) | 55(2) | -11(1) | 0(1)   | -3(1)  |
| C(16) | 31(2) | 31(2) | 42(2) | 11(2)  | -12(2) | -15(2) |
| F(17) | 62(2) | 56(2) | 69(2) | -12(2) | -34(2) | -5(1)  |
| C(17) | 27(2) | 28(2) | 41(2) | -2(2)  | -1(2)  | -7(1)  |
| F(18) | 54(2) | 61(2) | 72(2) | 29(2)  | 9(2)   | -6(2)  |
| C(18) | 27(2) | 29(2) | 26(2) | -3(1)  | -1(1)  | -9(1)  |
| C(19) | 36(2) | 39(2) | 23(2) | -10(1) | 3(1)   | -15(2) |
| C(20) | 41(2) | 39(2) | 60(3) | 21(2)  | -16(2) | -16(2) |
| C(21) | 42(2) | 44(2) | 25(2) | -5(2)  | 4(2)   | -2(2)  |
| C(22) | 29(2) | 25(2) | 21(2) | -6(1)  | 2(1)   | -9(1)  |
| C(23) | 41(2) | 29(2) | 38(2) | -6(2)  | 4(2)   | -7(2)  |
| C(24) | 40(2) | 39(2) | 27(2) | -9(2)  | 9(2)   | -16(2) |
| C(25) | 55(3) | 57(3) | 24(2) | -9(2)  | -4(2)  | -23(2) |
| C(26) | 27(2) | 25(2) | 29(2) | -8(1)  | 3(1)   | -15(1) |
| C(27) | 32(2) | 30(2) | 37(2) | -9(1)  | 8(1)   | -17(2) |
| C(28) | 36(2) | 42(2) | 45(2) | -13(2) | -1(2)  | -21(2) |
| C(29) | 37(2) | 30(2) | 43(2) | -1(2)  | 2(2)   | -10(2) |

Supporting Information

|       |       |       |       |       |       |        |
|-------|-------|-------|-------|-------|-------|--------|
| C(30) | 22(1) | 21(1) | 26(2) | -2(1) | -4(1) | -10(1) |
| C(31) | 22(2) | 20(1) | 29(2) | -3(1) | -2(1) | -10(1) |
| C(32) | 27(2) | 24(2) | 28(2) | -1(1) | -5(1) | -9(1)  |
| C(33) | 32(2) | 28(2) | 29(2) | -6(1) | 0(1)  | -10(1) |
| C(34) | 23(2) | 21(2) | 40(2) | -3(1) | 2(1)  | -8(1)  |
| C(35) | 21(2) | 24(2) | 38(2) | 2(1)  | -7(1) | -8(1)  |
| C(36) | 26(2) | 26(2) | 30(2) | 0(1)  | -5(1) | -12(1) |
| C(37) | 29(2) | 30(2) | 61(3) | 0(2)  | 0(2)  | 0(2)   |

**Table S8.** Crystal data and structure refinement for **Mo-8**.

|                                   |                                                                                                                                                    |
|-----------------------------------|----------------------------------------------------------------------------------------------------------------------------------------------------|
| Empirical formula                 | $C_{53}H_{44}AlClF_{41}MoN_2O_7$                                                                                                                   |
| Formula weight                    | 1758.27                                                                                                                                            |
| Temperature                       | 140(2) K                                                                                                                                           |
| Wavelength                        | 0.71073 Å                                                                                                                                          |
| Crystal system, space group       | Triclinic, $P\bar{1}$                                                                                                                              |
| Unit cell dimensions              | $a = 12.9654(8)$ Å, $\alpha = 79.898(2)^\circ$<br>$b = 13.8876(9)$ Å, $\beta = 78.994(2)^\circ$<br>$c = 19.3009(12)$ Å, $\gamma = 86.057(3)^\circ$ |
| Volume                            | $3356.2(4)$ Å <sup>3</sup>                                                                                                                         |
| Z, Calculated density             | 2, 1.740 Mg/m <sup>3</sup>                                                                                                                         |
| Absorption coefficient            | $0.412$ mm <sup>-1</sup>                                                                                                                           |
| F(000)                            | 1746                                                                                                                                               |
| Crystal size                      | 0.490 x 0.421 x 0.343 mm                                                                                                                           |
| Theta range for data collection   | 1.490 to 28.403 °.                                                                                                                                 |
| Limiting indices                  | $-17 \leq h \leq 17$ , $-18 \leq k \leq 18$ ,<br>$25 \leq l \leq 25$                                                                               |
| Reflections collected / unique    | 71115 / 16752 [R(int) = 0.0287]                                                                                                                    |
| Completeness to $\theta = 25.242$ | 99.90%                                                                                                                                             |
| Absorption correction             | Semi-empirical from equivalents                                                                                                                    |

|                                   |                                             |
|-----------------------------------|---------------------------------------------|
| Max. and min. transmission        | 0.7457 and 0.7096                           |
| Refinement method                 | Full-matrix least-squares on F <sup>2</sup> |
| Data / restraints / parameters    | 16752 / 66 / 1007                           |
| Goodness-of-fit on F <sup>2</sup> | 1.041                                       |
| Final R indices [I>2σ(I)]         | R1 = 0.0718, wR2 = 0.1740                   |
| R indices (all data)              | R1 = 0.0914, wR2 = 0.1845                   |
| Extinction coefficient            | n/a                                         |
| Largest diff. peak and hole       | 1.794 and -0.978 e.Å <sup>-3</sup>          |

**Table S9.** Atomic coordinates (x 10<sup>4</sup>) and equivalent isotropic displacement parameters (Å<sup>2</sup> x 10<sup>3</sup>) for **Mo-8**. U(eq) is defined as one third of the trace of the orthogonalized U<sub>ij</sub> tensor.

|       | x        | y       | z        | U(eq)  |
|-------|----------|---------|----------|--------|
| Mo(1) | 7995(1)  | 6755(1) | 7501(1)  | 20(1)  |
| O(1)  | 6718(2)  | 7047(2) | 7698(1)  | 30(1)  |
| N(1)  | 7081(2)  | 4977(2) | 7023(2)  | 26(1)  |
| C(1)  | 7795(3)  | 5687(2) | 6822(2)  | 22(1)  |
| F(1)  | 7677(3)  | 5374(2) | 8938(2)  | 58(1)  |
| O(2)  | 9196(2)  | 5980(2) | 7810(1)  | 32(1)  |
| N(2)  | 8305(3)  | 5537(2) | 6165(2)  | 28(1)  |
| C(2)  | 7150(4)  | 4394(3) | 6505(2)  | 38(1)  |
| F(2)  | 8118(5)  | 4141(3) | 10099(2) | 114(2) |
| O(3)  | 8145(2)  | 7464(2) | 8412(1)  | 28(1)  |
| C(3)  | 7916(4)  | 4743(3) | 5968(2)  | 42(1)  |
| F(3)  | 10126(6) | 3517(3) | 10150(2) | 140(3) |
| C(4)  | 6349(3)  | 4801(3) | 7693(2)  | 25(1)  |
| F(4)  | 11680(4) | 4169(4) | 9062(3)  | 127(2) |
| C(5)  | 6624(3)  | 4081(3) | 8233(2)  | 33(1)  |
| F(5)  | 11243(3) | 5416(3) | 7894(2)  | 75(1)  |
| C(6)  | 5892(4)  | 3903(4) | 8865(2)  | 47(1)  |
| C(7)  | 4938(4)  | 4404(4) | 8957(3)  | 51(1)  |

*Supporting Information*

|       |          |          |          |        |
|-------|----------|----------|----------|--------|
| C(8)  | 4685(3)  | 5096(4)  | 8402(2)  | 42(1)  |
| C(9)  | 5383(3)  | 5305(3)  | 7755(2)  | 29(1)  |
| C(10) | 7647(4)  | 3506(3)  | 8130(3)  | 44(1)  |
| C(11) | 4149(5)  | 4179(7)  | 9650(3)  | 89(2)  |
| C(12) | 5059(4)  | 6028(3)  | 7153(2)  | 40(1)  |
| C(13) | 9120(3)  | 6115(3)  | 5697(2)  | 27(1)  |
| C(14) | 10139(3) | 5981(3)  | 5815(2)  | 33(1)  |
| C(15) | 10883(3) | 6584(3)  | 5353(2)  | 38(1)  |
| C(16) | 10633(4) | 7244(3)  | 4782(2)  | 42(1)  |
| C(17) | 9615(4)  | 7307(3)  | 4660(2)  | 41(1)  |
| C(18) | 8828(3)  | 6763(3)  | 5120(2)  | 33(1)  |
| C(19) | 10461(4) | 5184(4)  | 6377(2)  | 52(1)  |
| C(20) | 11476(5) | 7870(4)  | 4286(3)  | 66(2)  |
| C(21) | 7726(4)  | 6861(4)  | 4981(3)  | 48(1)  |
| C(22) | 9437(4)  | 5404(3)  | 8385(2)  | 39(1)  |
| C(23) | 8667(5)  | 5079(3)  | 8963(3)  | 50(1)  |
| C(24) | 8894(7)  | 4444(4)  | 9556(3)  | 76(2)  |
| C(25) | 9893(9)  | 4137(4)  | 9579(4)  | 87(3)  |
| C(26) | 10708(7) | 4468(5)  | 9025(4)  | 84(3)  |
| C(27) | 10480(5) | 5099(4)  | 8420(3)  | 56(2)  |
| C(28) | 8536(3)  | 7783(2)  | 6770(2)  | 23(1)  |
| C(29) | 8161(3)  | 8776(3)  | 6439(2)  | 30(1)  |
| C(30) | 8878(5)  | 9126(3)  | 5721(2)  | 49(1)  |
| C(31) | 8261(4)  | 9467(3)  | 6958(2)  | 42(1)  |
| C(32) | 7027(4)  | 8781(4)  | 6339(3)  | 54(1)  |
| C(33) | 9087(3)  | 7882(3)  | 8527(2)  | 32(1)  |
| C(34) | 8699(4)  | 8492(4)  | 9110(3)  | 50(1)  |
| C(35) | 7692(5)  | 8032(5)  | 9498(3)  | 57(1)  |
| C(36) | 7231(4)  | 7768(4)  | 8903(2)  | 41(1)  |
| Al(1) | 2920(1)  | 10309(1) | 7682(1)  | 21(1)  |
| O(4)  | 2613(14) | 9820(20) | 6986(15) | 43(5)  |
| O(4A) | 2690(20) | 9510(20) | 7174(13) | 57(5)  |
| O(5)  | 1897(3)  | 11080(3) | 7930(2)  | 60(1)  |
| F(6)  | 4158(3)  | 8132(3)  | 6010(2)  | 88(1)  |
| O(6)  | 4123(6)  | 10824(6) | 7549(7)  | 43(3)  |
| O(6A) | 3864(5)  | 11068(5) | 7135(4)  | 44(2)  |
| F(7)  | 4453(3)  | 9640(3)  | 5917(2)  | 82(1)  |
| O(7)  | 2881(9)  | 9336(7)  | 8391(4)  | 35(3)  |
| O(7A) | 3409(6)  | 9714(5)  | 8387(3)  | 50(2)  |
| F(8)  | 4418(3)  | 8682(4)  | 6921(2)  | 89(1)  |
| F(9)  | 1358(4)  | 9693(4)  | 5992(3)  | 110(2) |
| F(10) | 2647(5)  | 10615(3) | 5795(3)  | 127(2) |
| F(11) | 2746(5)  | 9291(4)  | 5320(2)  | 114(2) |
| F(12) | 2087(4)  | 7704(3)  | 6315(3)  | 100(2) |
| F(13) | 1256(3)  | 8333(4)  | 7194(3)  | 108(2) |

*Supporting Information*

|       |          |          |          |        |
|-------|----------|----------|----------|--------|
| F(14) | 2693(4)  | 7541(3)  | 7260(2)  | 94(1)  |
| F(15) | 1574(3)  | 12456(3) | 6865(2)  | 65(1)  |
| F(16) | 1421(3)  | 13156(2) | 7785(2)  | 69(1)  |
| F(17) | 59(3)    | 12861(3) | 7375(3)  | 92(1)  |
| F(18) | 314(3)   | 9946(2)  | 7999(2)  | 70(1)  |
| F(19) | 363(3)   | 10960(3) | 7018(2)  | 74(1)  |
| F(20) | -814(3)  | 11115(3) | 7967(3)  | 88(1)  |
| F(21) | -287(3)  | 12301(3) | 8801(2)  | 90(1)  |
| F(22) | 1243(4)  | 11981(4) | 9029(2)  | 102(2) |
| F(23) | 219(4)   | 10776(3) | 9161(2)  | 88(1)  |
| F(24) | 5599(4)  | 12698(3) | 6131(3)  | 95(1)  |
| F(25) | 5738(3)  | 11152(3) | 6113(3)  | 92(1)  |
| F(26) | 4316(4)  | 11939(5) | 5971(4)  | 149(3) |
| F(27) | 3664(3)  | 12411(3) | 8064(4)  | 126(2) |
| F(28) | 4963(3)  | 13200(3) | 7433(3)  | 108(2) |
| F(29) | 3612(4)  | 13079(4) | 6971(4)  | 138(3) |
| F(30) | 5870(5)  | 10374(4) | 7466(3)  | 138(2) |
| F(31) | 5387(5)  | 11350(5) | 8191(3)  | 135(2) |
| F(32) | 6482(3)  | 11810(4) | 7217(2)  | 94(1)  |
| F(33) | 5030(4)  | 9365(5)  | 9104(4)  | 130(2) |
| F(34) | 3725(6)  | 10373(4) | 9425(4)  | 151(3) |
| F(35) | 3777(7)  | 9041(5)  | 10106(3) | 177(3) |
| F(36) | 4683(4)  | 8200(4)  | 8317(3)  | 114(2) |
| C(37) | 2781(3)  | 9123(3)  | 6575(2)  | 36(1)  |
| F(37) | 4238(5)  | 7549(4)  | 9381(3)  | 137(2) |
| C(38) | 3980(5)  | 8868(4)  | 6337(3)  | 58(1)  |
| F(38) | 3171(6)  | 7506(4)  | 8618(4)  | 143(2) |
| C(39) | 2371(6)  | 9699(5)  | 5910(4)  | 75(2)  |
| F(39) | 1905(4)  | 9629(5)  | 9759(3)  | 132(2) |
| C(40) | 2185(5)  | 8169(4)  | 6846(3)  | 58(1)  |
| F(40) | 2258(5)  | 7952(5)  | 9940(3)  | 138(2) |
| C(41) | 941(3)   | 11493(3) | 7982(2)  | 31(1)  |
| F(41) | 1575(4)  | 8652(6)  | 9042(5)  | 182(3) |
| C(42) | 1003(4)  | 12511(3) | 7497(3)  | 46(1)  |
| C(43) | 169(4)   | 10888(4) | 7742(3)  | 54(1)  |
| C(44) | 538(6)   | 11636(5) | 8761(3)  | 65(2)  |
| C(45) | 4679(4)  | 11659(4) | 7147(4)  | 69(2)  |
| C(46) | 5093(5)  | 11851(5) | 6333(5)  | 82(2)  |
| C(47) | 4224(5)  | 12607(5) | 7404(6)  | 94(3)  |
| C(48) | 5618(6)  | 11283(6) | 7511(5)  | 85(2)  |
| C(49) | 3292(5)  | 8983(4)  | 8998(2)  | 52(1)  |
| C(50) | 4047(8)  | 9454(7)  | 9417(5)  | 104(3) |
| C(51) | 3893(7)  | 8058(6)  | 8815(4)  | 83(2)  |
| C(52) | 2242(9)  | 8784(9)  | 9446(6)  | 116(3) |
| C(1X) | 5488(14) | 5206(17) | 4913(13) | 107(5) |



|        |          |          |          |        |
|--------|----------|----------|----------|--------|
| C(1Y)  | 5083(15) | 4705(18) | 4745(13) | 105(5) |
| Cl(1X) | 6424(2)  | 4506(2)  | 4402(2)  | 114(1) |

**Table S10.** Bond lengths [Å] and angles [°] for **Mo-8**.

|              |          |
|--------------|----------|
| Mo(1)-O(1)   | 1.664(3) |
| Mo(1)-C(28)  | 1.891(3) |
| Mo(1)-O(2)   | 1.958(3) |
| Mo(1)-C(1)   | 2.203(3) |
| Mo(1)-O(3)   | 2.205(2) |
| N(1)-C(1)    | 1.354(4) |
| N(1)-C(2)    | 1.379(5) |
| N(1)-C(4)    | 1.445(4) |
| C(1)-N(2)    | 1.357(4) |
| F(1)-C(23)   | 1.328(7) |
| O(2)-C(22)   | 1.326(5) |
| N(2)-C(3)    | 1.383(5) |
| N(2)-C(13)   | 1.440(4) |
| C(2)-C(3)    | 1.339(6) |
| C(2)-H(2)    | 0.95     |
| F(2)-C(24)   | 1.337(9) |
| O(3)-C(36)   | 1.457(5) |
| O(3)-C(33)   | 1.458(5) |
| C(3)-H(3)    | 0.95     |
| F(3)-C(25)   | 1.344(6) |
| C(4)-C(9)    | 1.387(5) |
| C(4)-C(5)    | 1.392(5) |
| F(4)-C(26)   | 1.310(8) |
| C(5)-C(6)    | 1.391(6) |
| C(5)-C(10)   | 1.498(6) |
| F(5)-C(27)   | 1.313(8) |
| C(6)-C(7)    | 1.373(7) |
| C(6)-H(6)    | 0.95     |
| C(7)-C(8)    | 1.381(7) |
| C(7)-C(11)   | 1.520(7) |
| C(8)-C(9)    | 1.393(6) |
| C(8)-H(8)    | 0.95     |
| C(9)-C(12)   | 1.501(5) |
| C(10)-H(10A) | 0.98     |
| C(10)-H(10B) | 0.98     |
| C(10)-H(10C) | 0.98     |
| C(11)-H(11A) | 0.98     |
| C(11)-H(11B) | 0.98     |
| C(11)-H(11C) | 0.98     |
| C(12)-H(12A) | 0.98     |

*Supporting Information*

|              |           |
|--------------|-----------|
| C(12)-H(12B) | 0.98      |
| C(12)-H(12C) | 0.98      |
| C(13)-C(14)  | 1.378(6)  |
| C(13)-C(18)  | 1.398(6)  |
| C(14)-C(15)  | 1.396(6)  |
| C(14)-C(19)  | 1.504(6)  |
| C(15)-C(16)  | 1.380(7)  |
| C(15)-H(15)  | 0.95      |
| C(16)-C(17)  | 1.378(7)  |
| C(16)-C(20)  | 1.519(6)  |
| C(17)-C(18)  | 1.387(6)  |
| C(17)-H(17)  | 0.95      |
| C(18)-C(21)  | 1.496(7)  |
| C(19)-H(19A) | 0.98      |
| C(19)-H(19B) | 0.98      |
| C(19)-H(19C) | 0.98      |
| C(20)-H(20A) | 0.98      |
| C(20)-H(20B) | 0.98      |
| C(20)-H(20C) | 0.98      |
| C(21)-H(21A) | 0.98      |
| C(21)-H(21B) | 0.98      |
| C(21)-H(21C) | 0.98      |
| C(22)-C(23)  | 1.380(8)  |
| C(22)-C(27)  | 1.400(7)  |
| C(23)-C(24)  | 1.383(7)  |
| C(24)-C(25)  | 1.343(12) |
| C(25)-C(26)  | 1.390(12) |
| C(26)-C(27)  | 1.400(8)  |
| C(28)-C(29)  | 1.504(5)  |
| C(28)-H(28)  | 0.98(4)   |
| C(29)-C(32)  | 1.519(6)  |
| C(29)-C(31)  | 1.531(5)  |
| C(29)-C(30)  | 1.534(6)  |
| C(30)-H(30A) | 0.98      |
| C(30)-H(30B) | 0.98      |
| C(30)-H(30C) | 0.98      |
| C(31)-H(31A) | 0.98      |
| C(31)-H(31B) | 0.98      |
| C(31)-H(31C) | 0.98      |
| C(32)-H(32A) | 0.98      |
| C(32)-H(32B) | 0.98      |
| C(32)-H(32C) | 0.98      |
| C(33)-C(34)  | 1.515(6)  |
| C(33)-H(33A) | 0.99      |
| C(33)-H(33B) | 0.99      |

*Supporting Information*

|              |           |
|--------------|-----------|
| C(34)-C(35)  | 1.500(7)  |
| C(34)-H(34A) | 0.99      |
| C(34)-H(34B) | 0.99      |
| C(35)-C(36)  | 1.501(6)  |
| C(35)-H(35A) | 0.99      |
| C(35)-H(35B) | 0.99      |
| C(36)-H(36A) | 0.99      |
| C(36)-H(36B) | 0.99      |
| Al(1)-O(7A)  | 1.674(5)  |
| Al(1)-O(4A)  | 1.679(11) |
| Al(1)-O(5)   | 1.696(3)  |
| Al(1)-O(6)   | 1.717(7)  |
| Al(1)-O(4)   | 1.724(12) |
| Al(1)-O(6A)  | 1.737(6)  |
| Al(1)-O(7)   | 1.743(7)  |
| O(4)-C(37)   | 1.343(14) |
| O(4A)-C(37)  | 1.342(13) |
| O(5)-C(41)   | 1.322(5)  |
| F(6)-C(38)   | 1.278(6)  |
| O(6)-C(45)   | 1.432(10) |
| O(6A)-C(45)  | 1.388(7)  |
| F(7)-C(38)   | 1.334(7)  |
| O(7)-C(49)   | 1.377(9)  |
| O(7A)-C(49)  | 1.406(8)  |
| F(8)-C(38)   | 1.335(7)  |
| F(9)-C(39)   | 1.294(8)  |
| F(10)-C(39)  | 1.315(8)  |
| F(11)-C(39)  | 1.354(9)  |
| F(12)-C(40)  | 1.332(7)  |
| F(13)-C(40)  | 1.288(7)  |
| F(14)-C(40)  | 1.309(7)  |
| F(15)-C(42)  | 1.313(6)  |
| F(16)-C(42)  | 1.326(6)  |
| F(17)-C(42)  | 1.334(6)  |
| F(18)-C(43)  | 1.329(6)  |
| F(19)-C(43)  | 1.358(7)  |
| F(20)-C(43)  | 1.302(7)  |
| F(21)-C(44)  | 1.364(8)  |
| F(22)-C(44)  | 1.289(8)  |
| F(23)-C(44)  | 1.348(7)  |
| F(24)-C(46)  | 1.347(8)  |
| F(25)-C(46)  | 1.311(8)  |
| F(26)-C(46)  | 1.319(9)  |
| F(27)-C(47)  | 1.332(11) |
| F(28)-C(47)  | 1.320(7)  |

*Supporting Information*

|                  |            |
|------------------|------------|
| F(29)-C(47)      | 1.322(11)  |
| F(30)-C(48)      | 1.296(9)   |
| F(31)-C(48)      | 1.307(9)   |
| F(32)-C(48)      | 1.355(8)   |
| F(33)-C(50)      | 1.310(10)  |
| F(34)-C(50)      | 1.317(10)  |
| F(35)-C(50)      | 1.342(11)  |
| F(36)-C(51)      | 1.265(9)   |
| C(37)-C(40)      | 1.539(7)   |
| C(37)-C(39)      | 1.552(7)   |
| C(37)-C(38)      | 1.569(7)   |
| F(37)-C(51)      | 1.328(8)   |
| F(38)-C(51)      | 1.395(10)  |
| F(39)-C(52)      | 1.418(12)  |
| F(40)-C(52)      | 1.364(12)  |
| C(41)-C(43)      | 1.535(6)   |
| C(41)-C(44)      | 1.537(6)   |
| C(41)-C(42)      | 1.551(6)   |
| F(41)-C(52)      | 1.311(12)  |
| C(45)-C(47)      | 1.530(8)   |
| C(45)-C(48)      | 1.535(11)  |
| C(45)-C(46)      | 1.543(11)  |
| C(49)-C(52)      | 1.482(12)  |
| C(49)-C(51)      | 1.516(9)   |
| C(49)-C(50)      | 1.617(11)  |
| C(1X)-C(1X)#1    | 1.38(4)    |
| C(1X)-Cl(1X)     | 1.76(2)    |
| C(1X)-H(1X1)     | 0.99       |
| C(1X)-H(1X2)     | 0.99       |
| C(1Y)-C(1Y)#1    | 1.37(4)    |
| C(1Y)-Cl(1X)     | 1.76(2)    |
| C(1Y)-H(1Y1)     | 0.99       |
| C(1Y)-H(1Y2)     | 0.99       |
| O(1)-Mo(1)-C(28) | 104.19(15) |
| O(1)-Mo(1)-O(2)  | 146.73(13) |
| C(28)-Mo(1)-O(2) | 107.41(14) |
| O(1)-Mo(1)-C(1)  | 94.78(13)  |
| C(28)-Mo(1)-C(1) | 98.43(13)  |
| O(2)-Mo(1)-C(1)  | 90.70(12)  |
| O(1)-Mo(1)-O(3)  | 85.50(11)  |
| C(28)-Mo(1)-O(3) | 96.81(12)  |
| O(2)-Mo(1)-O(3)  | 80.74(11)  |
| C(1)-Mo(1)-O(3)  | 164.20(11) |
| C(1)-N(1)-C(2)   | 111.1(3)   |

*Supporting Information*

|                     |          |
|---------------------|----------|
| C(1)-N(1)-C(4)      | 126.5(3) |
| C(2)-N(1)-C(4)      | 122.4(3) |
| N(1)-C(1)-N(2)      | 104.3(3) |
| N(1)-C(1)-Mo(1)     | 123.4(2) |
| N(2)-C(1)-Mo(1)     | 132.3(2) |
| C(22)-O(2)-Mo(1)    | 139.4(3) |
| C(1)-N(2)-C(3)      | 110.8(3) |
| C(1)-N(2)-C(13)     | 127.3(3) |
| C(3)-N(2)-C(13)     | 121.9(3) |
| C(3)-C(2)-N(1)      | 106.9(3) |
| C(3)-C(2)-H(2)      | 126.5    |
| N(1)-C(2)-H(2)      | 126.5    |
| C(36)-O(3)-C(33)    | 109.8(3) |
| C(36)-O(3)-Mo(1)    | 122.1(2) |
| C(33)-O(3)-Mo(1)    | 126.8(2) |
| C(2)-C(3)-N(2)      | 106.9(3) |
| C(2)-C(3)-H(3)      | 126.6    |
| N(2)-C(3)-H(3)      | 126.6    |
| C(9)-C(4)-C(5)      | 123.1(3) |
| C(9)-C(4)-N(1)      | 118.9(3) |
| C(5)-C(4)-N(1)      | 117.8(3) |
| C(6)-C(5)-C(4)      | 116.8(4) |
| C(6)-C(5)-C(10)     | 121.6(4) |
| C(4)-C(5)-C(10)     | 121.6(4) |
| C(7)-C(6)-C(5)      | 122.1(4) |
| C(7)-C(6)-H(6)      | 119      |
| C(5)-C(6)-H(6)      | 119      |
| C(6)-C(7)-C(8)      | 119.3(4) |
| C(6)-C(7)-C(11)     | 120.7(5) |
| C(8)-C(7)-C(11)     | 119.9(5) |
| C(7)-C(8)-C(9)      | 121.3(4) |
| C(7)-C(8)-H(8)      | 119.3    |
| C(9)-C(8)-H(8)      | 119.3    |
| C(4)-C(9)-C(8)      | 117.3(4) |
| C(4)-C(9)-C(12)     | 122.9(4) |
| C(8)-C(9)-C(12)     | 119.7(4) |
| C(5)-C(10)-H(10A)   | 109.5    |
| C(5)-C(10)-H(10B)   | 109.5    |
| H(10A)-C(10)-H(10B) | 109.5    |
| C(5)-C(10)-H(10C)   | 109.5    |
| H(10A)-C(10)-H(10C) | 109.5    |
| H(10B)-C(10)-H(10C) | 109.5    |
| C(7)-C(11)-H(11A)   | 109.5    |
| C(7)-C(11)-H(11B)   | 109.5    |
| H(11A)-C(11)-H(11B) | 109.5    |

*Supporting Information*

|                     |          |
|---------------------|----------|
| C(7)-C(11)-H(11C)   | 109.5    |
| H(11A)-C(11)-H(11C) | 109.5    |
| H(11B)-C(11)-H(11C) | 109.5    |
| C(9)-C(12)-H(12A)   | 109.5    |
| C(9)-C(12)-H(12B)   | 109.5    |
| H(12A)-C(12)-H(12B) | 109.5    |
| C(9)-C(12)-H(12C)   | 109.5    |
| H(12A)-C(12)-H(12C) | 109.5    |
| H(12B)-C(12)-H(12C) | 109.5    |
| C(14)-C(13)-C(18)   | 123.4(3) |
| C(14)-C(13)-N(2)    | 119.5(3) |
| C(18)-C(13)-N(2)    | 117.0(4) |
| C(13)-C(14)-C(15)   | 116.5(4) |
| C(13)-C(14)-C(19)   | 122.5(4) |
| C(15)-C(14)-C(19)   | 120.9(4) |
| C(16)-C(15)-C(14)   | 122.2(4) |
| C(16)-C(15)-H(15)   | 118.9    |
| C(14)-C(15)-H(15)   | 118.9    |
| C(17)-C(16)-C(15)   | 119.0(4) |
| C(17)-C(16)-C(20)   | 120.8(5) |
| C(15)-C(16)-C(20)   | 120.2(5) |
| C(16)-C(17)-C(18)   | 121.6(4) |
| C(16)-C(17)-H(17)   | 119.2    |
| C(18)-C(17)-H(17)   | 119.2    |
| C(17)-C(18)-C(13)   | 117.1(4) |
| C(17)-C(18)-C(21)   | 120.4(4) |
| C(13)-C(18)-C(21)   | 122.5(4) |
| C(14)-C(19)-H(19A)  | 109.5    |
| C(14)-C(19)-H(19B)  | 109.5    |
| H(19A)-C(19)-H(19B) | 109.5    |
| C(14)-C(19)-H(19C)  | 109.5    |
| H(19A)-C(19)-H(19C) | 109.5    |
| H(19B)-C(19)-H(19C) | 109.5    |
| C(16)-C(20)-H(20A)  | 109.5    |
| C(16)-C(20)-H(20B)  | 109.5    |
| H(20A)-C(20)-H(20B) | 109.5    |
| C(16)-C(20)-H(20C)  | 109.5    |
| H(20A)-C(20)-H(20C) | 109.5    |
| H(20B)-C(20)-H(20C) | 109.5    |
| C(18)-C(21)-H(21A)  | 109.5    |
| C(18)-C(21)-H(21B)  | 109.5    |
| H(21A)-C(21)-H(21B) | 109.5    |
| C(18)-C(21)-H(21C)  | 109.5    |
| H(21A)-C(21)-H(21C) | 109.5    |
| H(21B)-C(21)-H(21C) | 109.5    |

*Supporting Information*

|                     |          |
|---------------------|----------|
| O(2)-C(22)-C(23)    | 121.1(4) |
| O(2)-C(22)-C(27)    | 120.8(5) |
| C(23)-C(22)-C(27)   | 118.1(5) |
| F(1)-C(23)-C(22)    | 118.4(4) |
| F(1)-C(23)-C(24)    | 119.4(6) |
| C(22)-C(23)-C(24)   | 122.1(6) |
| F(2)-C(24)-C(25)    | 120.7(6) |
| F(2)-C(24)-C(23)    | 119.8(7) |
| C(25)-C(24)-C(23)   | 119.5(7) |
| C(24)-C(25)-F(3)    | 120.2(9) |
| C(24)-C(25)-C(26)   | 121.1(5) |
| F(3)-C(25)-C(26)    | 118.7(8) |
| F(4)-C(26)-C(25)    | 120.2(7) |
| F(4)-C(26)-C(27)    | 120.3(9) |
| C(25)-C(26)-C(27)   | 119.5(7) |
| F(5)-C(27)-C(26)    | 120.1(6) |
| F(5)-C(27)-C(22)    | 120.3(5) |
| C(26)-C(27)-C(22)   | 119.6(7) |
| C(29)-C(28)-Mo(1)   | 137.3(3) |
| C(29)-C(28)-H(28)   | 116(3)   |
| Mo(1)-C(28)-H(28)   | 105(3)   |
| C(28)-C(29)-C(32)   | 112.0(3) |
| C(28)-C(29)-C(31)   | 105.8(3) |
| C(32)-C(29)-C(31)   | 109.9(4) |
| C(28)-C(29)-C(30)   | 110.3(4) |
| C(32)-C(29)-C(30)   | 110.4(4) |
| C(31)-C(29)-C(30)   | 108.3(3) |
| C(29)-C(30)-H(30A)  | 109.5    |
| C(29)-C(30)-H(30B)  | 109.5    |
| H(30A)-C(30)-H(30B) | 109.5    |
| C(29)-C(30)-H(30C)  | 109.5    |
| H(30A)-C(30)-H(30C) | 109.5    |
| H(30B)-C(30)-H(30C) | 109.5    |
| C(29)-C(31)-H(31A)  | 109.5    |
| C(29)-C(31)-H(31B)  | 109.5    |
| H(31A)-C(31)-H(31B) | 109.5    |
| C(29)-C(31)-H(31C)  | 109.5    |
| H(31A)-C(31)-H(31C) | 109.5    |
| H(31B)-C(31)-H(31C) | 109.5    |
| C(29)-C(32)-H(32A)  | 109.5    |
| C(29)-C(32)-H(32B)  | 109.5    |
| H(32A)-C(32)-H(32B) | 109.5    |
| C(29)-C(32)-H(32C)  | 109.5    |
| H(32A)-C(32)-H(32C) | 109.5    |
| H(32B)-C(32)-H(32C) | 109.5    |

*Supporting Information*

|                     |           |
|---------------------|-----------|
| O(3)-C(33)-C(34)    | 104.8(3)  |
| O(3)-C(33)-H(33A)   | 110.8     |
| C(34)-C(33)-H(33A)  | 110.8     |
| O(3)-C(33)-H(33B)   | 110.8     |
| C(34)-C(33)-H(33B)  | 110.8     |
| H(33A)-C(33)-H(33B) | 108.9     |
| C(35)-C(34)-C(33)   | 103.7(4)  |
| C(35)-C(34)-H(34A)  | 111       |
| C(33)-C(34)-H(34A)  | 111       |
| C(35)-C(34)-H(34B)  | 111       |
| C(33)-C(34)-H(34B)  | 111       |
| H(34A)-C(34)-H(34B) | 109       |
| C(36)-C(35)-C(34)   | 102.6(4)  |
| C(36)-C(35)-H(35A)  | 111.2     |
| C(34)-C(35)-H(35A)  | 111.2     |
| C(36)-C(35)-H(35B)  | 111.2     |
| C(34)-C(35)-H(35B)  | 111.2     |
| H(35A)-C(35)-H(35B) | 109.2     |
| O(3)-C(36)-C(35)    | 103.7(4)  |
| O(3)-C(36)-H(36A)   | 111       |
| C(35)-C(36)-H(36A)  | 111       |
| O(3)-C(36)-H(36B)   | 111       |
| C(35)-C(36)-H(36B)  | 111       |
| H(36A)-C(36)-H(36B) | 109       |
| O(7A)-Al(1)-O(4A)   | 109.9(15) |
| O(7A)-Al(1)-O(5)    | 111.8(3)  |
| O(4A)-Al(1)-O(5)    | 115.7(13) |
| O(5)-Al(1)-O(6)     | 113.4(3)  |
| O(5)-Al(1)-O(4)     | 106.1(4)  |
| O(6)-Al(1)-O(4)     | 117.5(11) |
| O(7A)-Al(1)-O(6A)   | 109.2(4)  |
| O(4A)-Al(1)-O(6A)   | 105.2(6)  |
| O(5)-Al(1)-O(6A)    | 104.5(3)  |
| O(5)-Al(1)-O(7)     | 106.0(3)  |
| O(6)-Al(1)-O(7)     | 107.5(6)  |
| O(4)-Al(1)-O(7)     | 105.5(13) |
| C(37)-O(4)-Al(1)    | 148.8(14) |
| C(37)-O(4A)-Al(1)   | 156.0(13) |
| C(41)-O(5)-Al(1)    | 158.8(3)  |
| C(45)-O(6)-Al(1)    | 140.5(9)  |
| C(45)-O(6A)-Al(1)   | 143.0(7)  |
| C(49)-O(7)-Al(1)    | 143.3(9)  |
| C(49)-O(7A)-Al(1)   | 148.3(7)  |
| O(4A)-C(37)-C(40)   | 102.2(9)  |
| O(4)-C(37)-C(40)    | 118.1(17) |



*Supporting Information*

|                   |           |
|-------------------|-----------|
| O(4A)-C(37)-C(39) | 120.7(19) |
| O(4)-C(37)-C(39)  | 98.5(13)  |
| C(40)-C(37)-C(39) | 109.7(4)  |
| O(4A)-C(37)-C(38) | 106.8(14) |
| O(4)-C(37)-C(38)  | 112.7(8)  |
| C(40)-C(37)-C(38) | 109.3(4)  |
| C(39)-C(37)-C(38) | 107.7(5)  |
| F(6)-C(38)-F(7)   | 108.9(5)  |
| F(6)-C(38)-F(8)   | 108.9(5)  |
| F(7)-C(38)-F(8)   | 107.0(5)  |
| F(6)-C(38)-C(37)  | 113.8(5)  |
| F(7)-C(38)-C(37)  | 110.0(5)  |
| F(8)-C(38)-C(37)  | 108.1(4)  |
| F(9)-C(39)-F(10)  | 108.1(6)  |
| F(9)-C(39)-F(11)  | 105.7(6)  |
| F(10)-C(39)-F(11) | 109.5(7)  |
| F(9)-C(39)-C(37)  | 111.9(6)  |
| F(10)-C(39)-C(37) | 110.2(5)  |
| F(11)-C(39)-C(37) | 111.3(5)  |
| F(13)-C(40)-F(14) | 108.8(5)  |
| F(13)-C(40)-F(12) | 108.0(5)  |
| F(14)-C(40)-F(12) | 104.7(5)  |
| F(13)-C(40)-C(37) | 111.4(5)  |
| F(14)-C(40)-C(37) | 111.3(5)  |
| F(12)-C(40)-C(37) | 112.4(5)  |
| O(5)-C(41)-C(43)  | 112.4(4)  |
| O(5)-C(41)-C(44)  | 109.1(4)  |
| C(43)-C(41)-C(44) | 109.9(4)  |
| O(5)-C(41)-C(42)  | 108.6(4)  |
| C(43)-C(41)-C(42) | 108.2(4)  |
| C(44)-C(41)-C(42) | 108.6(4)  |
| F(15)-C(42)-F(16) | 108.4(4)  |
| F(15)-C(42)-F(17) | 105.6(5)  |
| F(16)-C(42)-F(17) | 108.5(4)  |
| F(15)-C(42)-C(41) | 110.8(4)  |
| F(16)-C(42)-C(41) | 111.4(4)  |
| F(17)-C(42)-C(41) | 111.8(4)  |
| F(20)-C(43)-F(18) | 106.6(4)  |
| F(20)-C(43)-F(19) | 110.2(5)  |
| F(18)-C(43)-F(19) | 105.9(5)  |
| F(20)-C(43)-C(41) | 113.6(5)  |
| F(18)-C(43)-C(41) | 109.5(4)  |
| F(19)-C(43)-C(41) | 110.6(4)  |
| F(22)-C(44)-F(23) | 109.8(6)  |
| F(22)-C(44)-F(21) | 105.7(5)  |

*Supporting Information*

|                   |          |
|-------------------|----------|
| F(23)-C(44)-F(21) | 108.8(5) |
| F(22)-C(44)-C(41) | 112.1(5) |
| F(23)-C(44)-C(41) | 109.6(5) |
| F(21)-C(44)-C(41) | 110.8(5) |
| O(6A)-C(45)-C(47) | 109.4(5) |
| O(6)-C(45)-C(47)  | 111.8(6) |
| O(6A)-C(45)-C(48) | 122.7(6) |
| O(6)-C(45)-C(48)  | 88.2(7)  |
| C(47)-C(45)-C(48) | 109.2(6) |
| O(6A)-C(45)-C(46) | 97.0(6)  |
| O(6)-C(45)-C(46)  | 126.6(7) |
| C(47)-C(45)-C(46) | 110.3(6) |
| C(48)-C(45)-C(46) | 107.3(5) |
| F(25)-C(46)-F(26) | 107.2(7) |
| F(25)-C(46)-F(24) | 107.8(6) |
| F(26)-C(46)-F(24) | 105.9(7) |
| F(25)-C(46)-C(45) | 113.0(7) |
| F(26)-C(46)-C(45) | 111.3(6) |
| F(24)-C(46)-C(45) | 111.3(6) |
| F(28)-C(47)-F(29) | 108.1(7) |
| F(28)-C(47)-F(27) | 106.6(7) |
| F(29)-C(47)-F(27) | 109.2(6) |
| F(28)-C(47)-C(45) | 112.3(5) |
| F(29)-C(47)-C(45) | 110.3(8) |
| F(27)-C(47)-C(45) | 110.2(7) |
| F(30)-C(48)-F(31) | 107.4(7) |
| F(30)-C(48)-F(32) | 107.5(6) |
| F(31)-C(48)-F(32) | 108.0(8) |
| F(30)-C(48)-C(45) | 112.3(8) |
| F(31)-C(48)-C(45) | 109.9(6) |
| F(32)-C(48)-C(45) | 111.6(6) |
| O(7)-C(49)-C(52)  | 93.1(7)  |
| O(7A)-C(49)-C(52) | 120.7(6) |
| O(7)-C(49)-C(51)  | 102.8(6) |
| O(7A)-C(49)-C(51) | 109.5(5) |
| C(52)-C(49)-C(51) | 112.6(7) |
| O(7)-C(49)-C(50)  | 132.5(7) |
| O(7A)-C(49)-C(50) | 96.4(6)  |
| C(52)-C(49)-C(50) | 111.6(6) |
| C(51)-C(49)-C(50) | 103.7(6) |
| F(33)-C(50)-F(34) | 112.7(9) |
| F(33)-C(50)-F(35) | 118.2(9) |
| F(34)-C(50)-F(35) | 102.8(7) |
| F(33)-C(50)-C(49) | 110.0(6) |
| F(34)-C(50)-C(49) | 107.1(8) |

|                      |           |
|----------------------|-----------|
| F(35)-C(50)-C(49)    | 105.2(8)  |
| F(36)-C(51)-F(37)    | 106.9(7)  |
| F(36)-C(51)-F(38)    | 109.8(7)  |
| F(37)-C(51)-F(38)    | 108.8(7)  |
| F(36)-C(51)-C(49)    | 114.6(7)  |
| F(37)-C(51)-C(49)    | 111.1(6)  |
| F(38)-C(51)-C(49)    | 105.7(6)  |
| F(41)-C(52)-F(40)    | 106.7(10) |
| F(41)-C(52)-F(39)    | 108.4(9)  |
| F(40)-C(52)-F(39)    | 113.1(9)  |
| F(41)-C(52)-C(49)    | 109.7(9)  |
| F(40)-C(52)-C(49)    | 112.0(8)  |
| F(39)-C(52)-C(49)    | 106.8(8)  |
| C(1X)#1-C(1X)-Cl(1X) | 112(2)    |
| C(1X)#1-C(1X)-H(1X1) | 109.2     |
| Cl(1X)-C(1X)-H(1X1)  | 109.2     |
| C(1X)#1-C(1X)-H(1X2) | 109.2     |
| Cl(1X)-C(1X)-H(1X2)  | 109.2     |
| H(1X1)-C(1X)-H(1X2)  | 107.9     |
| C(1Y)#1-C(1Y)-Cl(1X) | 113.0(19) |
| C(1Y)#1-C(1Y)-H(1Y1) | 109       |
| Cl(1X)-C(1Y)-H(1Y1)  | 109       |
| C(1Y)#1-C(1Y)-H(1Y2) | 109       |
| Cl(1X)-C(1Y)-H(1Y2)  | 109       |
| H(1Y1)-C(1Y)-H(1Y2)  | 107.8     |

**Table S11.** Anisotropic displacement parameters ( $\text{\AA}^2 \times 10^3$ ) for **Mo-8**. The anisotropic displacement factor exponent takes the form:  $-2\pi^2 [h^2 a^{*2} U_{11} + \dots + 2 h k a^* b^* U_{12}]$ .

|       | U11    | U22   | U33   | U23    | U13    | U12    |
|-------|--------|-------|-------|--------|--------|--------|
| Mo(1) | 23(1)  | 19(1) | 18(1) | -3(1)  | -1(1)  | -1(1)  |
| O(1)  | 24(1)  | 31(1) | 36(1) | -14(1) | 1(1)   | -3(1)  |
| N(1)  | 29(2)  | 21(1) | 26(1) | -6(1)  | 3(1)   | -6(1)  |
| C(1)  | 24(2)  | 18(2) | 21(2) | -4(1)  | 0(1)   | -1(1)  |
| F(1)  | 75(2)  | 54(2) | 41(2) | -3(1)  | 0(1)   | -23(2) |
| O(2)  | 37(2)  | 29(1) | 31(1) | -6(1)  | -12(1) | 9(1)   |
| N(2)  | 33(2)  | 24(2) | 25(1) | -7(1)  | 6(1)   | -7(1)  |
| C(2)  | 47(2)  | 29(2) | 39(2) | -15(2) | 6(2)   | -17(2) |
| F(2)  | 236(6) | 57(2) | 41(2) | 16(2)  | -19(3) | -33(3) |

*Supporting Information*

|       |        |        |        |        |         |        |
|-------|--------|--------|--------|--------|---------|--------|
| O(3)  | 28(1)  | 35(1)  | 24(1)  | -12(1) | 0(1)    | -4(1)  |
| C(3)  | 56(3)  | 32(2)  | 36(2)  | -19(2) | 9(2)    | -16(2) |
| F(3)  | 304(8) | 56(2)  | 89(3)  | -18(2) | -129(4) | 62(3)  |
| C(4)  | 24(2)  | 23(2)  | 25(2)  | -2(1)  | 0(1)    | -7(1)  |
| F(4)  | 162(5) | 106(3) | 162(5) | -83(3) | -136(4) | 95(3)  |
| C(5)  | 29(2)  | 29(2)  | 38(2)  | 4(2)   | -7(2)   | -6(2)  |
| F(5)  | 54(2)  | 90(3)  | 97(3)  | -51(2) | -31(2)  | 31(2)  |
| C(6)  | 41(2)  | 56(3)  | 36(2)  | 19(2)  | -5(2)   | -13(2) |
| C(7)  | 36(2)  | 70(3)  | 37(2)  | 8(2)   | 6(2)    | -14(2) |
| C(8)  | 24(2)  | 52(3)  | 45(2)  | -6(2)  | 2(2)    | -3(2)  |
| C(9)  | 26(2)  | 26(2)  | 33(2)  | -4(1)  | -4(1)   | -2(1)  |
| C(10) | 37(2)  | 34(2)  | 61(3)  | 3(2)   | -18(2)  | 2(2)   |
| C(11) | 54(4)  | 141(7) | 50(3)  | 19(4)  | 19(3)   | -23(4) |
| C(12) | 39(2)  | 34(2)  | 48(2)  | -1(2)  | -18(2)  | 5(2)   |
| C(13) | 34(2)  | 23(2)  | 22(2)  | -7(1)  | 7(1)    | -7(1)  |
| C(14) | 39(2)  | 32(2)  | 25(2)  | -13(2) | 6(2)    | -3(2)  |
| C(15) | 32(2)  | 44(2)  | 39(2)  | -23(2) | 9(2)    | -7(2)  |
| C(16) | 53(3)  | 29(2)  | 39(2)  | -15(2) | 21(2)   | -14(2) |
| C(17) | 56(3)  | 31(2)  | 28(2)  | 0(2)   | 8(2)    | -5(2)  |
| C(18) | 41(2)  | 29(2)  | 27(2)  | -8(1)  | 3(2)    | -5(2)  |
| C(19) | 44(3)  | 69(3)  | 35(2)  | -5(2)  | 2(2)    | 14(2)  |
| C(20) | 68(4)  | 43(3)  | 74(4)  | -17(3) | 38(3)   | -27(3) |
| C(21) | 49(3)  | 53(3)  | 41(2)  | -3(2)  | -12(2)  | 4(2)   |
| C(22) | 64(3)  | 24(2)  | 38(2)  | -10(2) | -29(2)  | 11(2)  |
| C(23) | 93(4)  | 28(2)  | 37(2)  | -4(2)  | -30(2)  | -3(2)  |
| C(24) | 161(7) | 33(3)  | 40(3)  | 0(2)   | -38(4)  | -7(4)  |
| C(25) | 182(9) | 39(3)  | 61(4)  | -18(3) | -77(5)  | 30(4)  |
| C(26) | 135(7) | 53(3)  | 95(5)  | -43(4) | -89(5)  | 54(4)  |
| C(27) | 72(4)  | 45(3)  | 69(3)  | -30(3) | -48(3)  | 27(3)  |
| C(28) | 27(2)  | 20(2)  | 23(2)  | -4(1)  | -5(1)   | -2(1)  |
| C(29) | 43(2)  | 20(2)  | 29(2)  | 0(1)   | -12(2)  | -5(2)  |
| C(30) | 85(4)  | 28(2)  | 28(2)  | 4(2)   | -6(2)   | -7(2)  |
| C(31) | 73(3)  | 20(2)  | 36(2)  | -6(2)  | -14(2)  | 1(2)   |
| C(32) | 58(3)  | 33(2)  | 78(4)  | 1(2)   | -40(3)  | 5(2)   |
| C(33) | 35(2)  | 35(2)  | 27(2)  | -7(2)  | -7(2)   | -5(2)  |
| C(34) | 65(3)  | 54(3)  | 38(2)  | -23(2) | -4(2)   | -15(2) |
| C(35) | 66(3)  | 71(4)  | 37(2)  | -30(2) | 2(2)    | -7(3)  |
| C(36) | 37(2)  | 54(3)  | 32(2)  | -22(2) | 9(2)    | -6(2)  |
| Al(1) | 19(1)  | 20(1)  | 25(1)  | -6(1)  | -3(1)   | -2(1)  |
| O(4)  | 53(6)  | 44(8)  | 43(7)  | -24(6) | -32(4)  | 20(4)  |
| O(4A) | 94(7)  | 44(7)  | 41(6)  | -23(5) | -17(5)  | -11(5) |
| O(5)  | 39(2)  | 58(2)  | 88(3)  | -30(2) | -21(2)  | 28(2)  |
| F(6)  | 89(3)  | 61(2)  | 101(3) | -33(2) | 28(2)   | 12(2)  |
| O(6)  | 28(4)  | 39(4)  | 64(7)  | -8(4)  | -7(3)   | -11(3) |
| O(6A) | 40(3)  | 45(3)  | 47(4)  | -4(3)  | -5(3)   | -26(3) |

*Supporting Information*

|       |         |        |         |        |        |        |
|-------|---------|--------|---------|--------|--------|--------|
| F(7)  | 71(2)   | 69(2)  | 92(3)   | -9(2)  | 17(2)  | -13(2) |
| O(7)  | 37(6)   | 31(5)  | 34(4)   | 13(3)  | -13(3) | -9(4)  |
| O(7A) | 53(4)   | 45(4)  | 54(3)   | 6(2)   | -31(3) | -3(3)  |
| F(8)  | 53(2)   | 125(4) | 88(3)   | -8(2)  | -30(2) | 21(2)  |
| F(9)  | 83(3)   | 120(4) | 141(4)  | -9(3)  | -76(3) | 13(3)  |
| F(10) | 137(4)  | 56(3)  | 186(6)  | 34(3)  | -79(4) | 0(3)   |
| F(11) | 156(5)  | 146(4) | 48(2)   | -12(2) | -47(3) | 1(4)   |
| F(12) | 122(4)  | 76(3)  | 116(4)  | -46(3) | -23(3) | -33(3) |
| F(13) | 55(2)   | 102(3) | 153(4)  | -30(3) | 32(3)  | -15(2) |
| F(14) | 93(3)   | 80(3)  | 87(3)   | 32(2)  | -5(2)  | 0(2)   |
| F(15) | 76(2)   | 72(2)  | 44(2)   | -1(2)  | -1(2)  | -24(2) |
| F(16) | 74(2)   | 46(2)  | 85(2)   | -28(2) | 12(2)  | -24(2) |
| F(17) | 55(2)   | 59(2)  | 139(4)  | 37(2)  | -16(2) | 15(2)  |
| F(18) | 88(3)   | 33(2)  | 88(2)   | -7(2)  | -11(2) | -18(2) |
| F(19) | 90(3)   | 85(3)  | 61(2)   | -15(2) | -36(2) | -27(2) |
| F(20) | 37(2)   | 71(2)  | 155(4)  | -15(2) | -14(2) | -10(2) |
| F(21) | 92(3)   | 74(2)  | 91(3)   | -40(2) | 35(2)  | 6(2)   |
| F(22) | 146(4)  | 122(4) | 55(2)   | -33(2) | -41(2) | -27(3) |
| F(23) | 124(4)  | 82(3)  | 46(2)   | 5(2)   | 8(2)   | -20(2) |
| F(24) | 98(3)   | 75(3)  | 113(4)  | 0(2)   | -27(3) | -29(2) |
| F(25) | 76(3)   | 79(3)  | 119(4)  | -39(3) | 12(2)  | -8(2)  |
| F(26) | 98(4)   | 166(6) | 228(7)  | -92(5) | -89(4) | 8(4)   |
| F(27) | 70(3)   | 92(3)  | 210(6)  | -89(4) | 58(3)  | -30(2) |
| F(28) | 75(3)   | 73(3)  | 183(5)  | -66(3) | 15(3)  | -42(2) |
| F(29) | 70(3)   | 83(3)  | 268(8)  | -60(4) | -26(4) | 28(3)  |
| F(30) | 146(5)  | 80(3)  | 135(4)  | 18(3)  | 55(4)  | 44(3)  |
| F(31) | 137(5)  | 153(5) | 85(3)   | -1(3)  | 24(3)  | 17(4)  |
| F(32) | 43(2)   | 130(4) | 100(3)  | -5(3)  | 0(2)   | -13(2) |
| F(33) | 79(3)   | 133(5) | 171(6)  | -44(4) | 9(3)   | -3(3)  |
| F(34) | 193(6)  | 94(4)  | 157(5)  | -71(4) | 41(5)  | -18(4) |
| F(35) | 308(10) | 193(7) | 53(3)   | -20(3) | -63(4) | -92(6) |
| F(36) | 107(4)  | 139(4) | 88(3)   | -43(3) | 7(3)   | 53(3)  |
| C(37) | 39(2)   | 39(2)  | 37(2)   | -18(2) | -15(2) | 7(2)   |
| F(37) | 147(5)  | 129(4) | 113(4)  | 26(3)  | -42(3) | 85(4)  |
| C(38) | 62(3)   | 58(3)  | 49(3)   | -13(2) | 2(2)   | -6(3)  |
| F(38) | 186(5)  | 111(4) | 172(5)  | -88(4) | -82(4) | 18(4)  |
| C(39) | 78(5)   | 65(4)  | 88(5)   | 2(3)   | -44(4) | 1(3)   |
| F(39) | 105(4)  | 155(5) | 127(4)  | -63(4) | 19(3)  | 41(3)  |
| C(40) | 57(3)   | 57(3)  | 59(3)   | -13(3) | -6(3)  | -5(3)  |
| F(40) | 124(5)  | 146(5) | 118(4)  | 10(4)  | 25(4)  | -48(4) |
| C(41) | 28(2)   | 31(2)  | 35(2)   | -12(2) | -10(2) | 7(2)   |
| F(41) | 72(3)   | 235(8) | 278(10) | -98(7) | -86(5) | 25(4)  |
| C(42) | 39(2)   | 35(2)  | 62(3)   | -6(2)  | -3(2)  | -4(2)  |
| C(43) | 45(3)   | 51(3)  | 68(3)   | -1(2)  | -17(2) | -14(2) |
| C(44) | 88(5)   | 60(3)  | 43(3)   | -15(2) | 5(3)   | -12(3) |

*Supporting Information*

|        |        |         |         |         |        |        |
|--------|--------|---------|---------|---------|--------|--------|
| C(45)  | 35(3)  | 40(3)   | 126(6)  | -29(3)  | 19(3)  | -21(2) |
| C(46)  | 49(4)  | 67(4)   | 138(7)  | -33(4)  | -18(4) | -10(3) |
| C(47)  | 37(3)  | 60(4)   | 188(9)  | -58(5)  | 15(4)  | -16(3) |
| C(48)  | 68(4)  | 77(5)   | 95(5)   | -11(4)  | 22(4)  | 0(4)   |
| C(49)  | 71(3)  | 52(3)   | 30(2)   | -6(2)   | -14(2) | 29(3)  |
| C(50)  | 124(8) | 116(7)  | 83(6)   | -56(5)  | -20(5) | 15(6)  |
| C(51)  | 88(4)  | 85(4)   | 73(3)   | -13(3)  | -21(3) | 30(3)  |
| C(52)  | 109(5) | 120(5)  | 117(5)  | -13(4)  | -22(4) | 5(4)   |
| C(1X)  | 49(9)  | 135(12) | 154(15) | -58(10) | -33(8) | 11(9)  |
| C(1Y)  | 48(9)  | 136(12) | 151(15) | -60(10) | -37(8) | 13(9)  |
| Cl(1X) | 64(1)  | 163(2)  | 134(2)  | -67(2)  | -37(1) | 32(1)  |
